# Supplementary material
Source: PubMed Central journal article supplement (PMC3432702)
Supplement: NIHMS390374-supplement-1.pdf [file NIHMS390374-supplement-1.pdf]

## Exome sequencing identifies recurrent somatic RAC1 mutations in melanoma

Michael Krauthammer<sup>1</sup>, Yong Kong<sup>2,3</sup>, Byung Hak Ha<sup>4</sup>, Perry Evans<sup>1</sup>, Antonella Bacchiocchi<sup>5</sup>, James P McCusker<sup>1</sup>, Elaine Cheng<sup>5</sup>, Matthew J Davis<sup>4</sup>, Gerald Goh<sup>6,7</sup>, Murim Choi<sup>6,7</sup>, Stephan Ariyan<sup>8</sup>, Deepak Narayan<sup>8</sup>, Ken Dutton-Regester<sup>9,10</sup>, Ana Capatana<sup>1</sup>, Edna C Holman<sup>5</sup>, Marcus Bosenberg<sup>5</sup>, Mario Sznol<sup>11</sup>, Harriet M Kluger<sup>11</sup>, Douglas E Brash<sup>5,6,12</sup>, David F Stern<sup>1</sup>, Miguel A Materin<sup>13</sup>, Roger S Lo<sup>14</sup>, Shrikant Mane<sup>6,15,16</sup>, Shuangge Ma<sup>17</sup>, Kenneth K Kidd<sup>6</sup>, Nicholas K. Hayward<sup>10</sup>, Richard P Lifton<sup>6,7</sup>, Joseph Schlessinger<sup>4</sup>, Titus J Boggon<sup>4</sup>, Ruth Halaban<sup>5\*</sup>

<sup>1</sup>Department of Pathology, Yale University School of Medicine, New Haven, CT, 06520-8059

<sup>2</sup>Department of Molecular Biophysics and Biochemistry, Yale University School of Medicine, New Haven, CT, 06520-8059

<sup>3</sup>W.M. Keck Foundation Biotechnology Resource Laboratory, Yale University School of Medicine, New Haven, CT, 06520-8059

<sup>4</sup>Department of Pharmacology, Yale University School of Medicine, New Haven, CT, 06520

<sup>5</sup>Department of Dermatology, Yale University School of Medicine, New Haven, CT, 06520

<sup>6</sup>Department of Genetics, Yale University School of Medicine, New Haven, CT, 06520

<sup>7</sup>Howard Hughes Medical Institute, Yale University School of Medicine, New Haven, CT, 06520

<sup>8</sup>Department of Surgery, Yale University School of Medicine, New Haven, CT, 06520

<sup>9</sup>Queensland University of Technology, Brisbane, QLD, Australia

<sup>10</sup>Queensland Institute of Medical Research, Brisbane, QLD, Australia.

<sup>11</sup>Comprehensive Cancer Center Section of Medical Oncology, Yale University School of Medicine, New Haven, CT, 06520

<sup>12</sup>Department of Therapeutic Radiology, Yale University School of Medicine, New Haven, CT, 06520

<sup>13</sup>Department of Ophthalmology, Yale University School of Medicine, New Haven, CT, 06520

<sup>14</sup>Division of Dermatology/Department of Medicine, UCLA Jonsson Comprehensive Cancer Center, Los Angeles, CA 90095-1750.

<sup>15</sup>Center for Human Genetics and Genomics Yale University School of Medicine, New Haven, CT, 06520

<sup>16</sup>Program on Neurogenetics, Yale University School of Medicine, New Haven, CT,

06520<sup>17</sup>School of Public Health, Yale University School of Medicine, New Haven, CT, 06520

\* Correspondence should be addressed to RH (ruth.halaban@yale.edu).

## Addendum to the Online Methods

*Identification of genes with significant somatic mutation burden:* In order to calculate a list of significantly mutated genes, i.e., genes with more mutations than expected by the background mutation frequency, we modified a recently established protocol<sup>1</sup>. In essence, we used the non-silent to silent mutation ratio (NS:SN ratio), i.e., the number of mutations that cause amino acid changes over those that do not, and the silent mutation frequency, i.e., the number of silent mutations over the number of sequenced bases, to estimate the non-silent background mutation frequency. The latter is then used to determine whether some observed number of non-silent mutations in a gene is above the expected. We also used insights into melanoma-specific mutation patterns to calculate mutation frequencies based on sequence contexts, and on expression of the gene locus. We measured an increase in mutational frequency when studying non-expressed versus expressed genes, and observed that most mutations occur at cytosines in the dipyrimidine context, as clearly shown in Figure 1. Taken together, this led us to calculate the non-silent background mutation frequencies separately for expressed and non-expressed genes, and separately for the three following sequence contexts: 1) mutating Cs at dipyrimidines, 2) mutating Cs at non-dipyrimidines, and 3) mutating Ts, which stand for, respectively, mutations in cytosines with a flanking pyrimidine, mutations in cytosines without a flanking pyrimidine, and mutations in thymines with no restriction on the flanking bases. For example, a C>T mutations in a TC\*G context would be counted towards mutations in the C *dipyrimidine* context, as would a G>A mutation in the CG\*A context (i.e., the reverse complement). Conversely, a C>T mutation in the GC\*G context would be counted towards the C *non-dipyrimidine* context.

The context-specific non-silent mutation frequency  $MF_{NS,C}$  is estimated by

$MF_{NS,C} = MF_{SN,C} \times NS : SN_C$  where  $MF_{SN,C}$  is the context-specific silent mutation frequency, i.e., the number of silent somatic mutations in context C divided over all bases in context C with sufficient sequence depth in the exome capture region, and  $NS : SN_C$  is the non-silent to silent ratio for mutations in context C (see below). We calculated  $MF_{NS,C}$  for each of the three contexts, and performed, for each gene, and for each context, a binomial test for whether the observed non-silent mutations in a gene are explained by  $MF_{NS,C}$ , receiving 3 distinct and independent p-values for each context. We then use the Fisher's combined probability test to generate an overall p-value measuring whether the number of non-silent mutations in a gene is more than expected.

We added two additional processing steps to the basic workflow discussed above. As the NS:SN ratios vary considerably between genes, we estimated gene-specific NS:SN ratios in each of the three contexts. We proceeded as follows: we first identified all bases in a particular gene that are positioned in the context C under consideration. We then performed an in-silico

experiment where we mutated each base and recorded whether the change resulted in a non-silent change or not. The resulting ratios between non-silent and silent changes were weighted according to the observed frequencies for a particular base change. The frequencies for each base change, in each context, were calculated from the frequencies of the observed silent and non-silent base changes, with the exception of non-silent changes in the top 100 mutated genes, which may be enriched for driver mutations (the top 100 genes were determined by dividing the number of observed somatic mutations by the gene length, and ranking of the resulting ratios). We determined an overall NS:SN ratio, across the three contexts, and across all genes, of 1.93 in sun-exposed melanomas, close to the observed NS:SN ratio of 2.0. We added an additional processing step for genes, which exhibited context-specific non-silent mutation counts beyond what was expected by the exome-wide  $MF_{SN,C}$ . For those genes, instead of using  $MF_{SN,C}$ , we estimated a  $MF_{SN,C,G}$  by dividing the observed silent mutations in gene G over the number of bases in context C across gene G. This adjustment is necessary to account for biases, for which we did not account for in the model, and which have not been fully studied and quantified in melanoma. Among these are replication timing, location on the chromosome and others<sup>2</sup>, all of which may affect the number of mutations in a gene.

We then combined the p-values for the individual binomial tests across contexts, using the Fisher combined method. The resulting ranking and p-values are labeled as “Comprehensive Model”. We also calculated two more rankings: the first one did not take into account expression (“No Expression Model”), and the other one did not weigh the genes according to their silent counts, and did not take into account expression and sequence context (“Simple Model”). The latter model represents a simple weighting of the somatic mutations by gene length and a single exome-wide background mutation frequency based on a (context-independent) exome-wide NS:SN ratio. The final gene burden ranks were matched against similar ranks that were generated by excluding the top 5% of mutated samples, in order to ensure robustness of the results. Only genes that were ranked high in both lists were retained. It should be noted that for these calculations, SNVs affecting the same codon were counted as independent events.

*Identification of genes with a significant number of deleterious mutations.* We tabulated nonsense SNVs, splice-site variants, frame-shift InDels, and InDels with insertion or deletions of 3 or more codons, across all sun-exposed melanomas, including the unmatched samples. We used a binomial test to find genes enriched in deleterious mutations, using the exome-wide frequency of these mutations. For each highly ranked gene, we required that at least 30% of the mutations were in the matched melanoma set.

### **Gene expression**

Whole genome gene expression was derived from hybridization to NimbleGen human whole genome expression microarrays and RNA-Seq. Array analysis was performed on 15

melanomas and four independent human melanocytes at NimbleGen Systems Iceland LLC. Vínlandsleið 2-4, 113 Reykjavik, Iceland (currently Roche Applied Science, Basel, Switzerland) and by the Yale W.M. Keck Foundation Biotechnology Resource as described<sup>3,4</sup>. Data from the array analysis was used to identify expressed genes in normal melanocytes and melanomas. Genes with median expression value of 550 and above were called expressed.

RNA-Seq was performed on two independent cultures of two normal human melanocytes cultures derived from newborn foreskins and adult skin. Total RNA was extracted using Trizol (Invitrogen) followed by DNase digestion and Qiagen RNeasy (Qiagen, Valencia, CA) column purification following the manufacture's protocol. The RNA integrity was verified using an Agilent Bioanalyzer 2100 (Agilent, Palo Alto, CA). One microgram of high-quality RNA was processed using an Illumina RNA-Seq sample prep kit following the manufacturer's instructions (Illumina, San Diego, CA). Final RNA-Seq libraries were sequenced at 75 bp/sequence using an GAIIx Illumina sequencer. Reads were processed with bwa and SAMtools. Mapping was performed against the reference genome. Reads were counted in bins of 100 bp, and normalized with regard to the median. To calculate the expression value for a particular RefSeq transcript, we determined the transcript exon boundaries, and summed up all bin read values for bins within the boundaries. The transcript length-normalized, and log-transformed value was used as the measure of gene expression. A two component Gaussian mixture model was fit to the data, and a lower bound for expressed genes was chosen as two standard deviations away from the higher distribution mean. The RNA-Seq data is used for identifying expressed genes in normal melanocytes for the gene burden analysis.

## **Supplementary Results**

### **Sequencing statistics**

*Mean error rate and coverage:* We first tested the sequence fidelity and read coverage of all Illumina sequencing runs. In general, there was an excellent low average sequencing error rate of 0.24%, representing the fraction of bases from sequencing reads that do not align with the reference genome. The average coverage was  $65 \pm 14.8$  independent reads per targeted base pair (minimum mean sample coverage 30, maximum mean sample coverage 93) for tumor samples sequenced with the Illumina GA IIx, and  $224 \pm 47$  independent reads per targeted base pair for samples sequenced with the Illumina HiSeq 2000 (minimum sample coverage 100, maximum sample coverage 376). The % bases covered at least eight times across the capture area were 90.5% for GA IIx, and 97.2% for HiSeq 2000. We compared the mean number of somatic mutations in melanomas that have been sequenced using the GAIIx and HiSeq technologies. We found that both technologies resulted in comparable non-synonymous somatic SNV counts. Both the GAII-sequenced and HiSeq-sequenced melanoma were evenly distributed among Figure 1a (ranking of melanomas by mutation count), and both technologies contributed to

samples with counts above the 90<sup>th</sup> percentile. Below the 90<sup>th</sup> percentile, GAll-sequenced sun-exposed melanomas had a median of 123 somatic mutations, while HiSeq-sequenced melanomas had a median count of 154. The median number of SNVs in sun-shielded melanomas was 11 (GAll) and 7 (HiSeq), respectively. We compared the mutation counts in melanomas from cell lines and fresh frozen tumors. The median number of somatic mutations in sun-exposed cell lines and tumors was 138 and 168, respectively. The corresponding numbers in sun-shielded melanomas was 10 and 7.

*Somatic SNV call precision based on Sanger validations:* The precision analysis for our two-step somatic calling pipeline was as follows: we first established the precision of calling a tumor SNV (establishing the presence of the variant in tumor), and then determined the precision of classifying it as a somatic variant based on matched germline DNA data. We defined precision as the ratio of correctly called variants over all called variants.

Validation by Sanger sequencing revealed that of 266 SNVs that were automatically called according to the thresholds discussed above, 21 were false positives. We thus calculated a precision of  $245/266 = 92.1\%$  for calling tumor variants in Exome-Seq. In the presence of a matched germline DNA sample, we called a tumor variant as either somatic or inherited. To determine somatic call precision, we determined by Sanger sequencing how many of the somatic calls were actually inherited SNVs, or false positive tumor SNVs that are erroneously called somatic. We counted 80 tumor SNVs that were called using the thresholds above, and for which we had matched germline DNA sequencing data: 64 of those were true somatic variants, 9 were inherited variants, and 7 were false positive variants. The sequencing pipeline automatically called 59 out of the 80 SNVs as somatic. Of those, 55 were true positive somatic SNVs, one was an inherited SNV, and 3 were false positive tumor SNVs. We thus determined a somatic call precision of  $55/59 = 93.2\%$ .

*Somatic SNV call sensitivity based on detection of SNVs in germline DNA:* The true total number of somatic changes in tumor is not known, and yet there is a need to assess somatic call sensitivity, which is defined as the number of called variants over all real variants. We designed a somatic call sensitivity estimate based on our two-step somatic call procedure: First, we determined the sensitivity of detecting the presence of a variant in tumor. Then, we established the sensitivity of detecting those variants that are somatic using matched germline DNA sequencing data. For the estimation, we assumed that detection of SNVs in tumor could be equated to detecting inherited tumor SNVs given adequate tumor purity. We therefore estimated the sensitivity of detecting tumor SNVs by counting the number of known SNPs in germline DNA, which are positively called in a matched tumor, measuring a mean sensitivity of 95% across our melanomas. We then measured our ability to detect those tumor SNVs that are somatic. Using our 64 automatically called tumor SNVs that were Sanger validated (somatic) and had corresponding sequencing data in germline DNA, we correctly called 55 of those

variants as somatic, a somatic call sensitivity of 55/64=85.9%. Overall sensitivity to detect somatic variants is thus estimated to be  $0.95 \times 0.859 = 81.6\%$ .

*Somatic SNV call sensitivity for known melanoma driver mutations:* Routine Sanger sequencing of all 147 melanomas in our Exome-Seq screens identified 50 *BRAF*<sup>V600</sup> (V600E/K/R), 25 *NRAS*<sup>Q61</sup> (Q61L/R/H), two *NRAS*<sup>G12</sup> (G12D/V), two *NRAS* (G13D/R) and one *HRAS*<sup>Q61</sup> mutations. We determined the sensitivity of Exome-Seq to identify these variants. At the thresholds discussed earlier, Exome-Seq automatically called all but two *BRAF*, and all *NRAS* and *HRAS* variants, a SNV detection sensitivity of 79/81=97.5%. For matched samples all but one *BRAF*, and all *NRAS* and *HRAS* mutations were correctly called somatic. One of the failed *BRAF* calls in tumor was due to high level of fibroblast contamination in the cell culture (80%). *BRAF* and *NRAS* mutations likely occur early in melanoma genesis, and are thought to be present across all tumor clones. Difficulties in detecting these mutations are therefore primarily caused by stromal tissue contamination, as opposed to clonal heterogeneity. The fact that most of these variants were recovered indicates that our sequencing depth and sensitivity are sufficient to retrieve variants with similar clonal distributions as *BRAF* and *NRAS* mutations.

### Structural analysis

The crystal structure of *RAC1*<sup>P29S</sup> in complex with GMP-PNP is broadly unchanged from *RAC1*<sup>WT</sup> in complex with GMP-PNP both previously published<sup>5</sup>, and described here (**Supplementary Table 10**). The major exceptions are the conformational differences in the switch I loop. Overall the structure shows RMSDs of 0.8 Å and 0.7 Å over 177 and 175 C $\alpha$  atoms for chains A and B when compared to *RAC1*<sup>WT</sup>, PDB ID: 1MH1<sup>5</sup>, and smaller differences to *RAC1*<sup>WT</sup> described here (see above). Comparison of chains A and B of *RAC1*<sup>P29S</sup> shows that both chains have very similar conformation with RMSD of 0.4 Å over 175 C $\alpha$  atoms. *RAC1*<sup>P29S</sup> shows good electron density throughout the structure, with average protein *B*-factors of 30.7 Å<sup>2</sup>.

The electron density for the *RAC1*<sup>P29S</sup> switch I region, GMP-PNP and Mg<sup>2+</sup>, is well defined for both molecules in the asymmetric unit (**Supplementary Fig. 7**). In molecule A, hydrogen bonds of 2.9 Å between S29 carbonyl oxygen and ribose 2'-hydroxyl and 2.9 Å between G30 carbonyl oxygen and ribose 3'-hydroxyl are observed. In molecule B, hydrogen bonds of 2.9 Å and 3.1 Å between G30 carbonyl oxygen and ribose 2'-hydroxyl and 3'-hydroxyl respectively are observed, and the S29 carbonyl oxygen is 3.3 Å from the ribose 2'-hydroxyl group (**Supplementary Fig. 7**).

It is unusual in a crystal structure of a RHO family GTPase to observe direct hydrogen bonding interactions between backbone carbonyls of P29 and G30 and the ribose hydroxyl groups; in RHO family GTPases the ribose hydroxyl-switch I backbone interactions are usually mediated through water molecules. There are few previous examples of direct hydrogen bonding between switch I and the ribose hydroxyls for RHO family GTPases. These include a) three RND1 structures: 2CLS (RND1, unpublished), 2REX (RND1 bound with PLXNB1,

unpublished), and 3Q3J (RND1 in complex with plexin A2 RBD, unpublished); b) RHO1P – Sec3p complex from *Saccharomyces cerevisia*, PDB ID: 3A58<sup>6</sup>; and c) photoactivatable RAC1-LOV2 fusion protein, PDB ID: 2WKP<sup>7</sup>. Although these crystal structures suggest that Proline at position 29 does not absolutely preclude hydrogen bond formation between the switch I backbone and ribose hydroxyl groups, these cases are unusual for RHO GTPase family members (Supplementary Fig. 9). In contrast, for non-RHO family GTPases direct interactions between the ribose hydroxyl groups and switch I backbone are common (**Supplementary Fig. 8**). To confirm these differences we superposed a collection of GTP- or GTP-analogue-bound GTPase structures deposited in the Protein Data Bank of either RHO family GTPases or GTPases that are not members of the RHO family onto the crystal structure of RAC1<sup>P29S</sup>, using the program TOPP<sup>8</sup>. The superposition illustrates that the switch I backbone conformation of RAC1<sup>P29S</sup> diverges from RHO family GTPases (**Supplementary Fig. 8b**) and is similar to GTPases that are not members of the RHO family (**Supplementary Fig. 8c**). The highly conserved proline residue at position 29 in RAC1, 29 in CDC42 and 31 in RHOA is not observed in most non-RHO family GTPases. Proline at this location therefore seems to stabilize the conformation of switch I and to reduce the ability of RHO family GTPases to form hydrogen bonds between the switch I peptide backbone and ribose hydroxyls. The RAC1 P29S mutation therefore releases this conformational restraint allowing altered GTPase signal transduction. Overall, the clear electron density profile of switch I in RAC1<sup>P29S</sup> (**Supplementary Fig. 7**) suggests that this region of the protein is stabilized by direct hydrogen bonding between the peptide backbone and ribose hydroxyls.

#### Supplementary References

1. Ding, L. *et al.* Somatic mutations affect key pathways in lung adenocarcinoma. *Nature* 455, 1069-1075 (2008).
2. Hodgkinson, A., Chen, Y. & Eyre-Walker, A. The large-scale distribution of somatic mutations in cancer genomes. *Hum Mutat* 33, 136-143 (2012).
3. Halaban, R. *et al.* Integrative analysis of epigenetic modulation in melanoma cell response to decitabine: clinical implications. *PLoS ONE* 4, e4563 (2009).
4. Tworokski, K. *et al.* Phosphoproteomic screen identifies potential therapeutic targets in melanoma. *Mol Cancer Res* 9, 801-812 (2011).
5. Hirshberg, M., Stockley, R.W., Dodson, G. & Webb, M.R. The crystal structure of human rac1, a member of the rho-family complexed with a GTP analogue. *Nat Struct Biol* 4, 147-152 (1997).
6. Yamashita, M. *et al.* Structural basis for the Rho- and phosphoinositide-dependent localization of the exocyst subunit Sec3. *Nat Struct Mol Biol* 17, 180-186 (2010).
7. Wu, Y.I. *et al.* A genetically encoded photoactivatable Rac controls the motility of living cells. *Nature* 461, 104-108 (2009).
8. Collaborative Computational Project, N. The CCP4 suite: programs for protein crystallography. *Acta Crystallogr D Biol Crystallogr* 50, 760-763 (1994).
9. Brash, D.E. *et al.* A role for sunlight in skin cancer: UV-induced p53 mutations in squamous cell carcinoma. *Proc Natl Acad Sci USA* 88, 10124-10128 (1991).

10. Wennerberg, K., Rossman, K.L. & Der, C.J. The Ras superfamily at a glance. *J Cell Sci* 118, 843-846 (2005).
11. Wallace, A.C., Laskowski, R.A. & Thornton, J.M. LIGPLOT: a program to generate schematic diagrams of protein-ligand interactions. *Protein Eng* 8, 127-134 (1995).



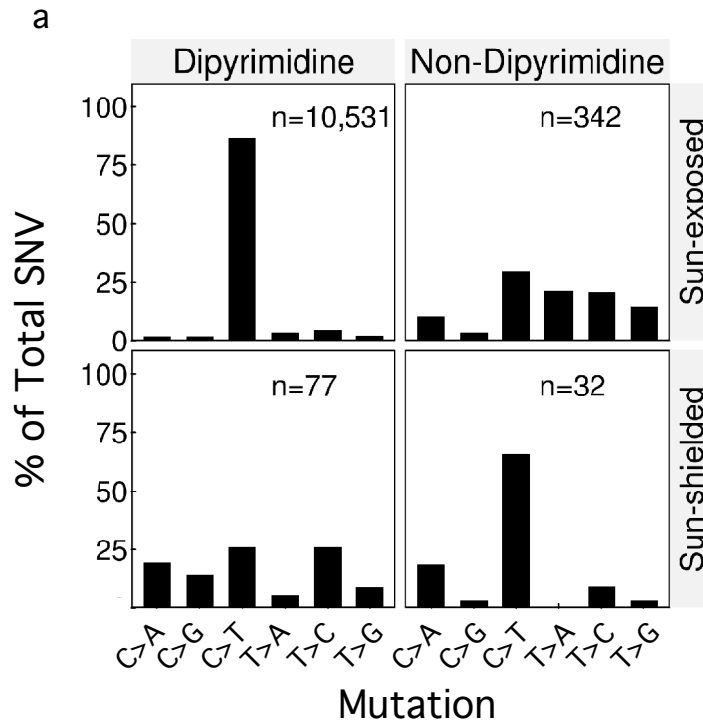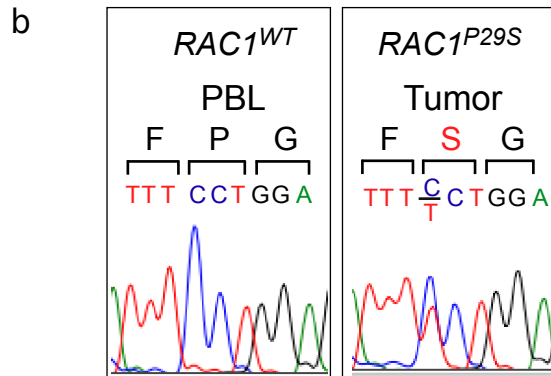

**Supplementary Figure 1.** Spectrum of somatic variants in introns and UV signature mutation. a, The histogram shows an excess of C>T transitions in the dipyrimidine context in sun-exposed melanomas (top) compared to sun-shielded melanomas (bottom), an indication of UV exposure and DNA damage for those melanomas or their precursors, similar to that shown for exons (Fig. 1b). b, Sanger electropherogram showing YUPROST germline DNA (PBL) compared to tumor (1.1 mm primary melanoma) at the site of the *RAC1*<sup>P29S</sup> mutation. The amino acid sequence of the adjacent mutation site is indicated.

**a** PTPRK (protein tyrosine phosphatase, receptor type, K)

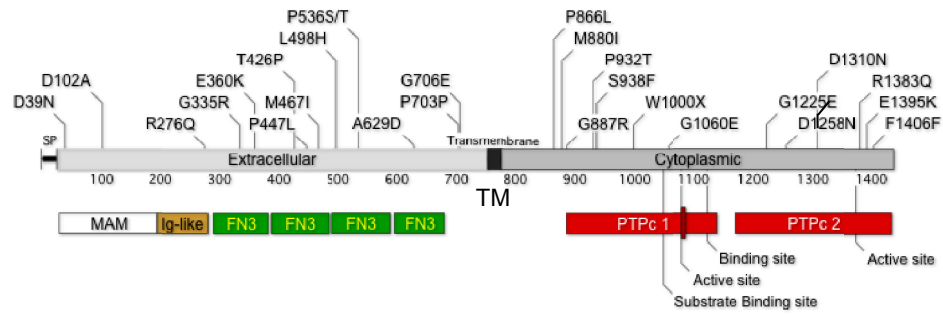

**b** PTPRD (protein tyrosine phosphatase, receptor type, D)

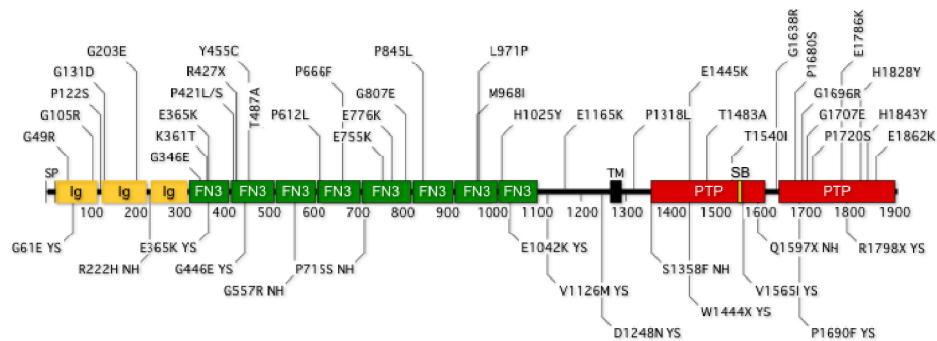

**c**

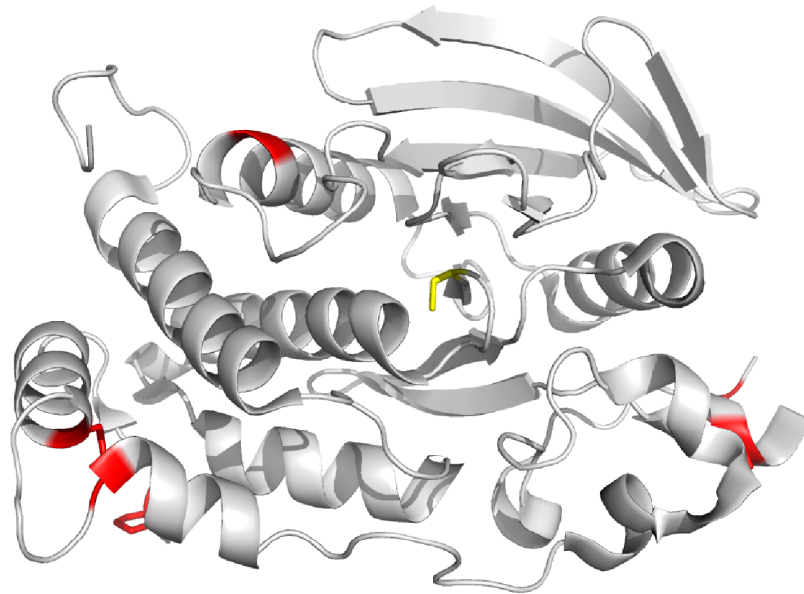

Supplementary Figure 2: PTPRK and PTPRD mutations, and PTPRK crystal structure. a, and b show schematic representations of PTPRK and PTPRD depicting functional domains and the position of mutations in the complete cohort (147 matched and unmatched melanoma samples). The published mutations in PTPRD are shown below the bar with initials of the communicating author (YS, Yardena Samuels; NH, Nicholas Hayward). c, Crystal structure of phosphatase domain 1 from PTPRK, PDB ID: 2C7S. The locations of P866L, M880I, G887R, P932T, S938F and G1060E mutations are shown in red. The active site cysteine is shown in yellow.

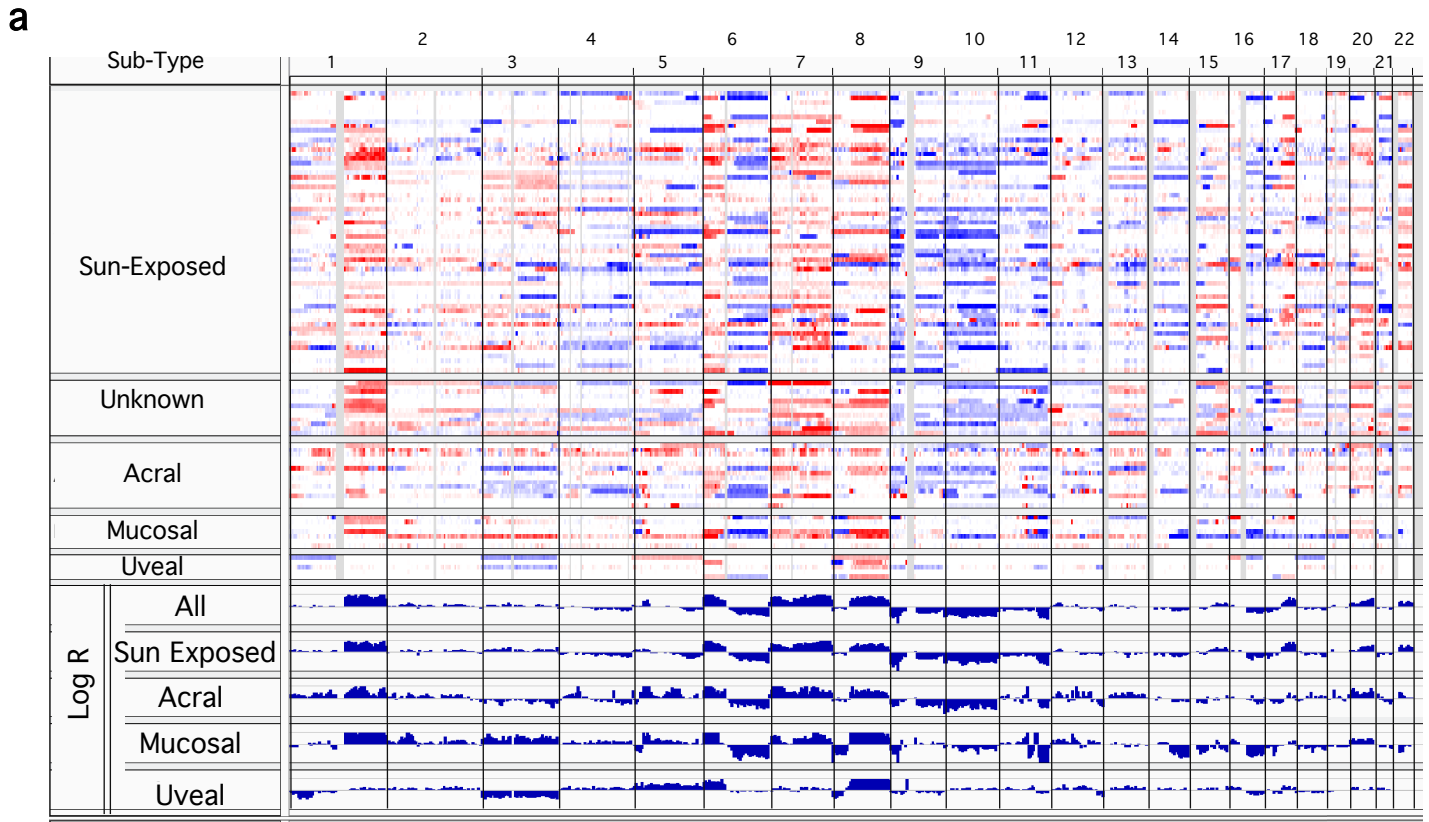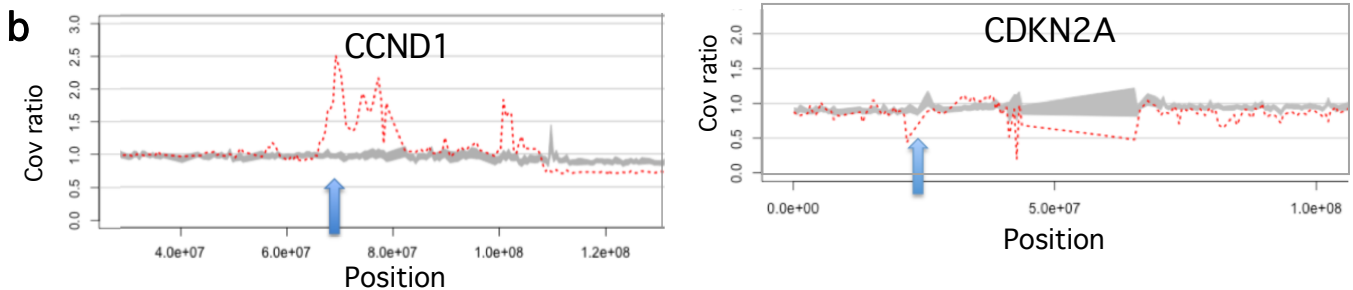

Supplementary Figure 3: Somatic copy number alterations (SCNAs) in matched melanomas. a, Heat map showing genomic aberrations across matched melanoma samples. Gain and loss regions are indicated in red and blue, respectively. The x-axis represents genomic position beginning with chromosome 1p and ending with chromosome 22 (numbered 1-22, top). The mean log fold change (R) across melanomas is featured in the bottom tracks. b, Composite plots of the normalized coverage ratio between tumor and normal samples for the overall chromosome using all 99 matched samples. Left and right show amplification in CCND1 and deletion in CDKN2A. Red is the mean of samples with the CNV; the grey shaded area is the 95% confidence interval of the mean coverage ratios of the samples without the CNV at each position. Blue arrows indicate approximate location of gene.

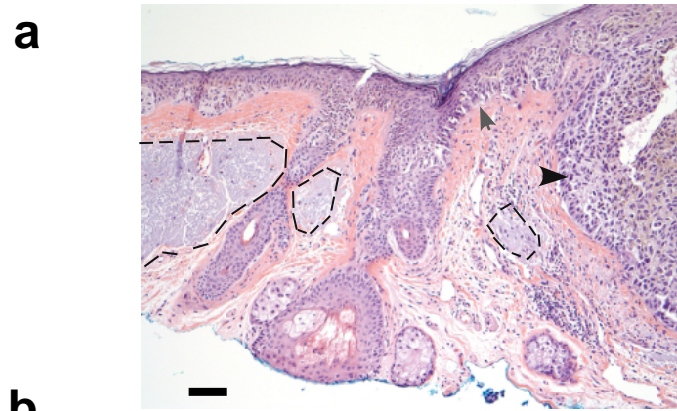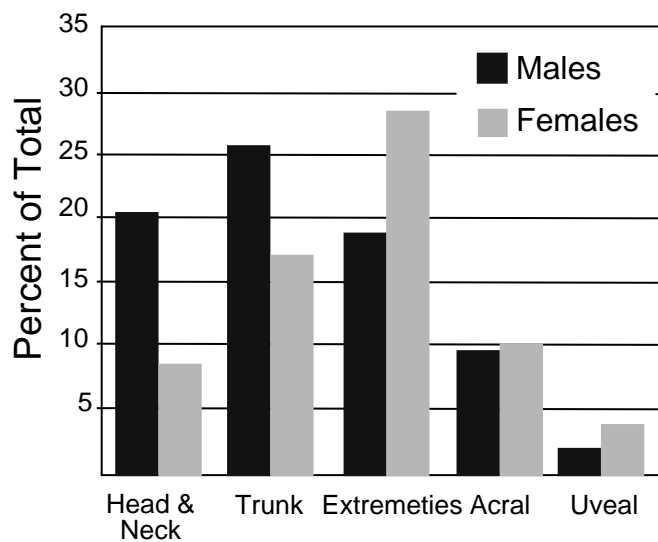

Supplementary Figure 4. Sun damage and frequency of melanoma body sitedistribution. a, YUVEME primary melanoma with RAC1P29S mutation showing extensive solar elastosis (marked with broken lines). Grey and dark arrows point at the malignant sections. Scale bar represents 0.1 mm. b, Frequency distribution of melanomas by location and sex in the Yale cohort. The data represent 312 patients composed of 144 males and 87 females. Fisher's exact test shows that the head and neck lesions are particularly significantly enriched in men compared to women with p values as follows: Head and neck: 0.0043; Trunk: 0.097; Legs and arms: 0.055; Acral: 1.0; Ocular (uveal): 0.49.

### Matched melanoma (n=99)

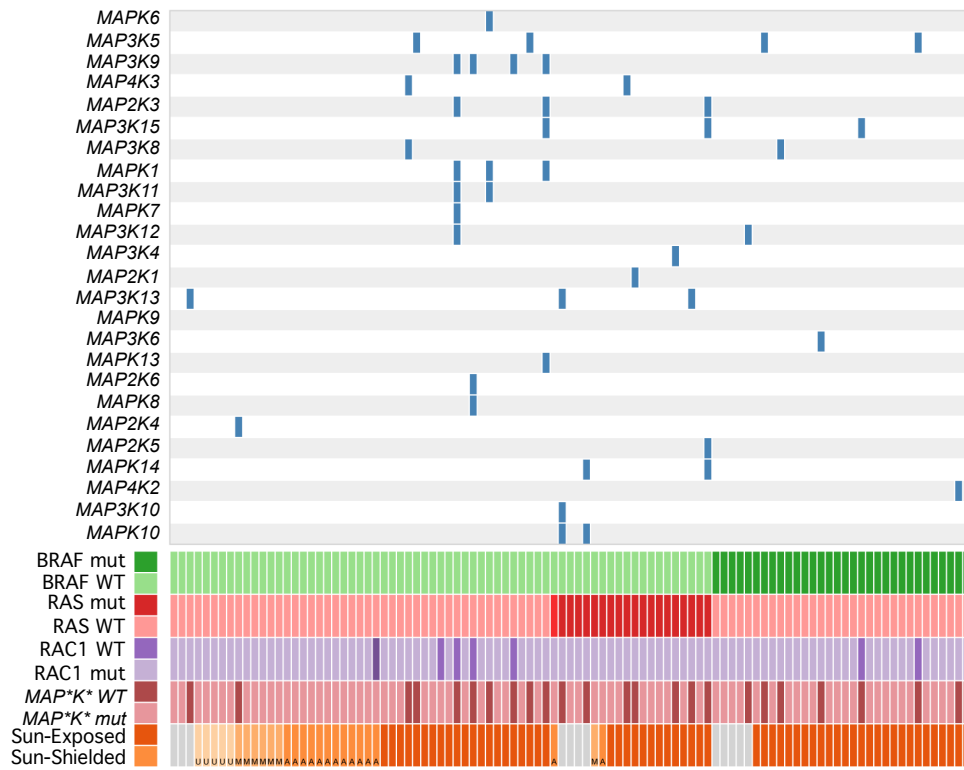

**Supplementary Figure 5: Genes with somatic *MAPK* SNVs.** The figure shows the occurrence of somatic *MAPK* SNVs across all matched melanoma samples. Blue rectangles indicate samples with somatic mutations

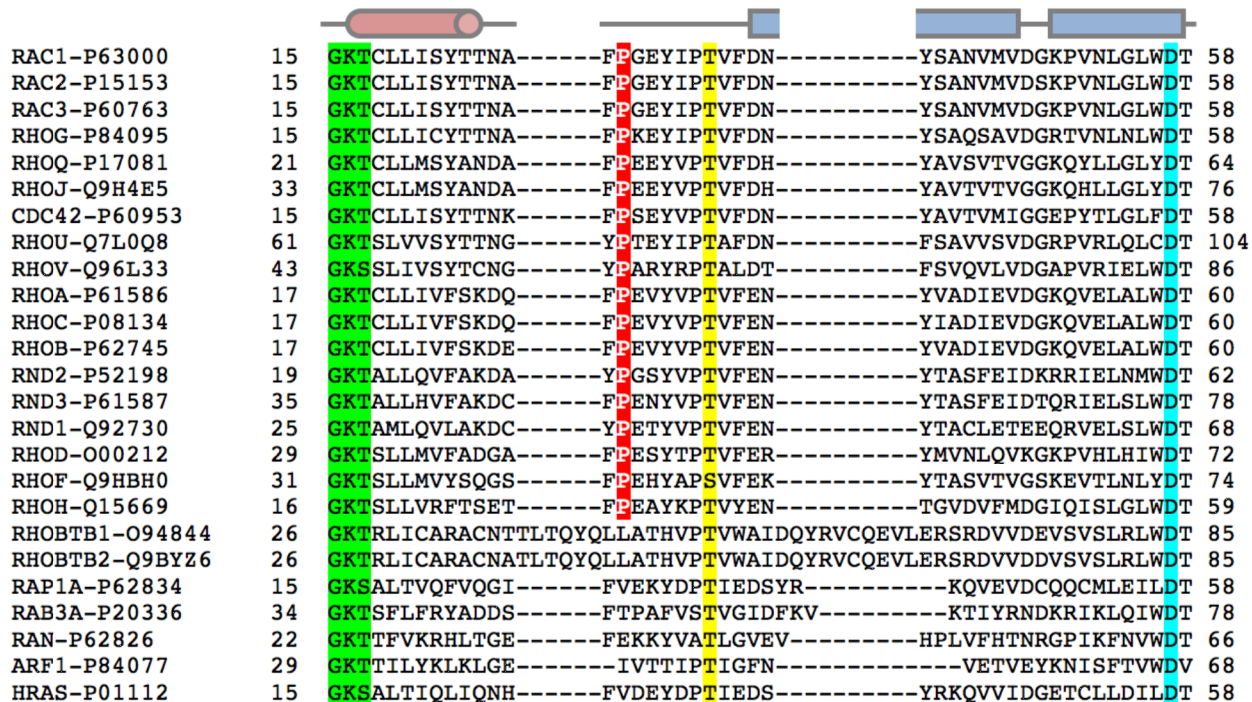

**Supplementary Figure 6. Alignment of human RHO-family GTPases.** The figure shows alignment of human RHO-family GTPases. The switch I loop region is shown. The conserved proline corresponding to codon 29 in RAC1 is highlighted in red. The Swiss-Prot ID for each protein is indicated. Representative non-RHO-family GTPases are shown. Conserved residues of the G1, G2 and G3 elements are also highlighted in green, yellow and blue, respectively<sup>10</sup>. Alignment made using ClustalW. Secondary structure elements for RAC1<sup>P29S</sup> crystal indicated,  $\alpha$ -helix as a cylinder,  $\beta$ -strand as blue rectangle, loop as line.

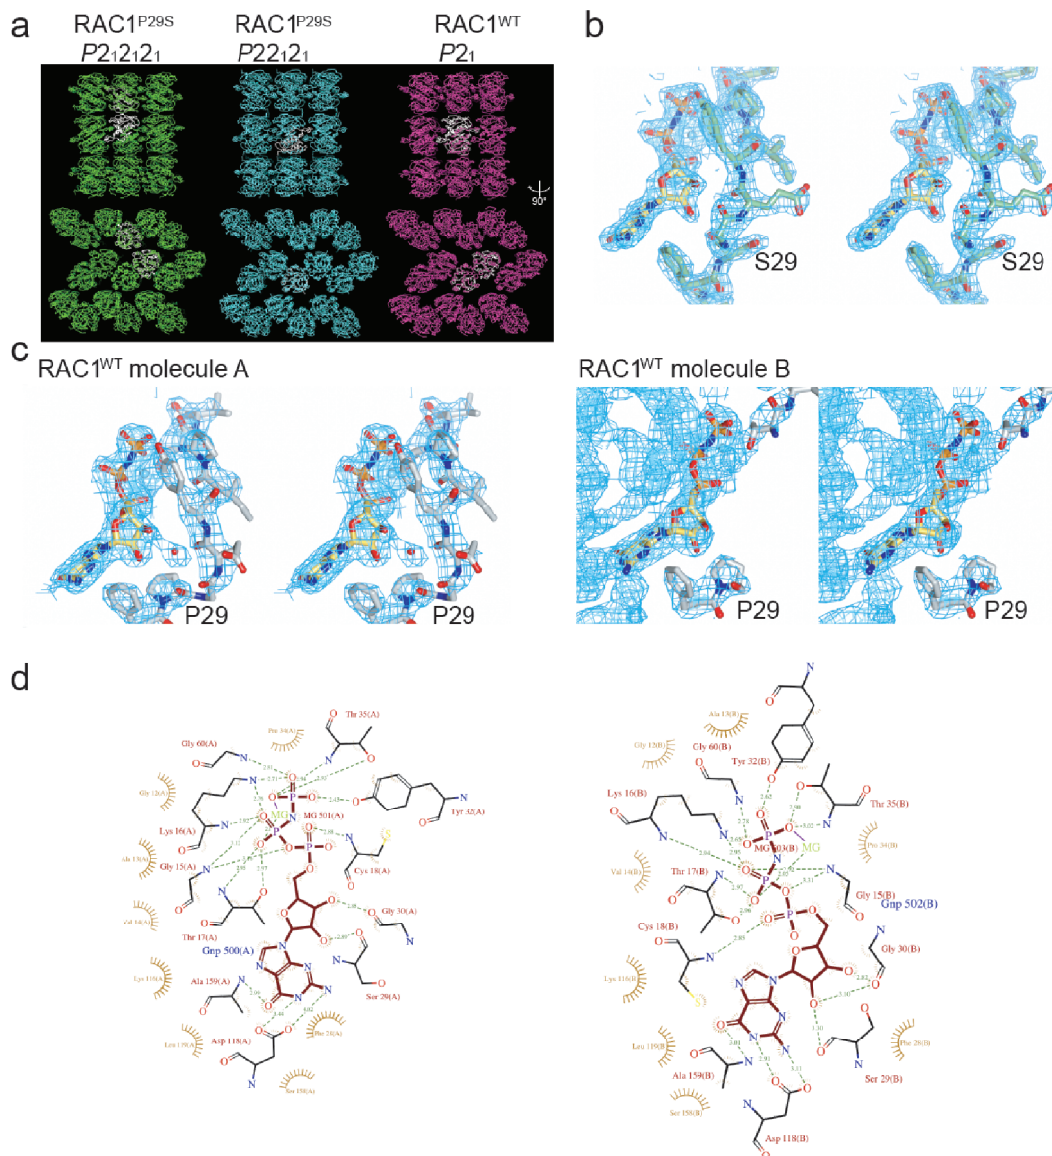

**Supplementary Figure 7. Analysis of the Switch I region of RAC1.** **a**, Lattices of RAC1<sup>P29S</sup> and RAC1<sup>WT</sup> crystals. Asymmetric unit colored white. The RAC1<sup>P29S</sup> and RAC1<sup>WT</sup> crystals pack in a very similar fashion. **b**, Stereoview of  $2F_o-F_c$  electron density for the switch I region of RAC1<sup>P29S</sup> contoured at  $1\sigma$  (blue) and  $2\sigma$  (light blue). For clarity, electron density is clipped at 2 Å from either GMP-PNP or the switch I region. **c**, Stereoview of  $2F_o-F_c$  electron density for the switch I region of RAC1<sup>WT</sup>. The switch I regions of both molecules (A and B) of the asymmetric unit are shown. The switch I loop shows poor electron density in molecule A and is not visible in molecule B. The wild-type crystal structure clearly shows that the switch I region of RAC1<sup>WT</sup> is conformationally flexible and that this is not due to crystal packing effects. Maps for molecule A are contoured and clipped as per panel B. Maps for molecule B are contoured as per panel B and are clipped at 20 Å from GMP-PNP. **d**, Ligplot<sup>11</sup> diagrams for GMP-PNP bound to molecules A (left) and B (right) of the P2<sub>1</sub>2<sub>1</sub>2<sub>1</sub> crystal structure of RAC1<sup>P29S</sup>.

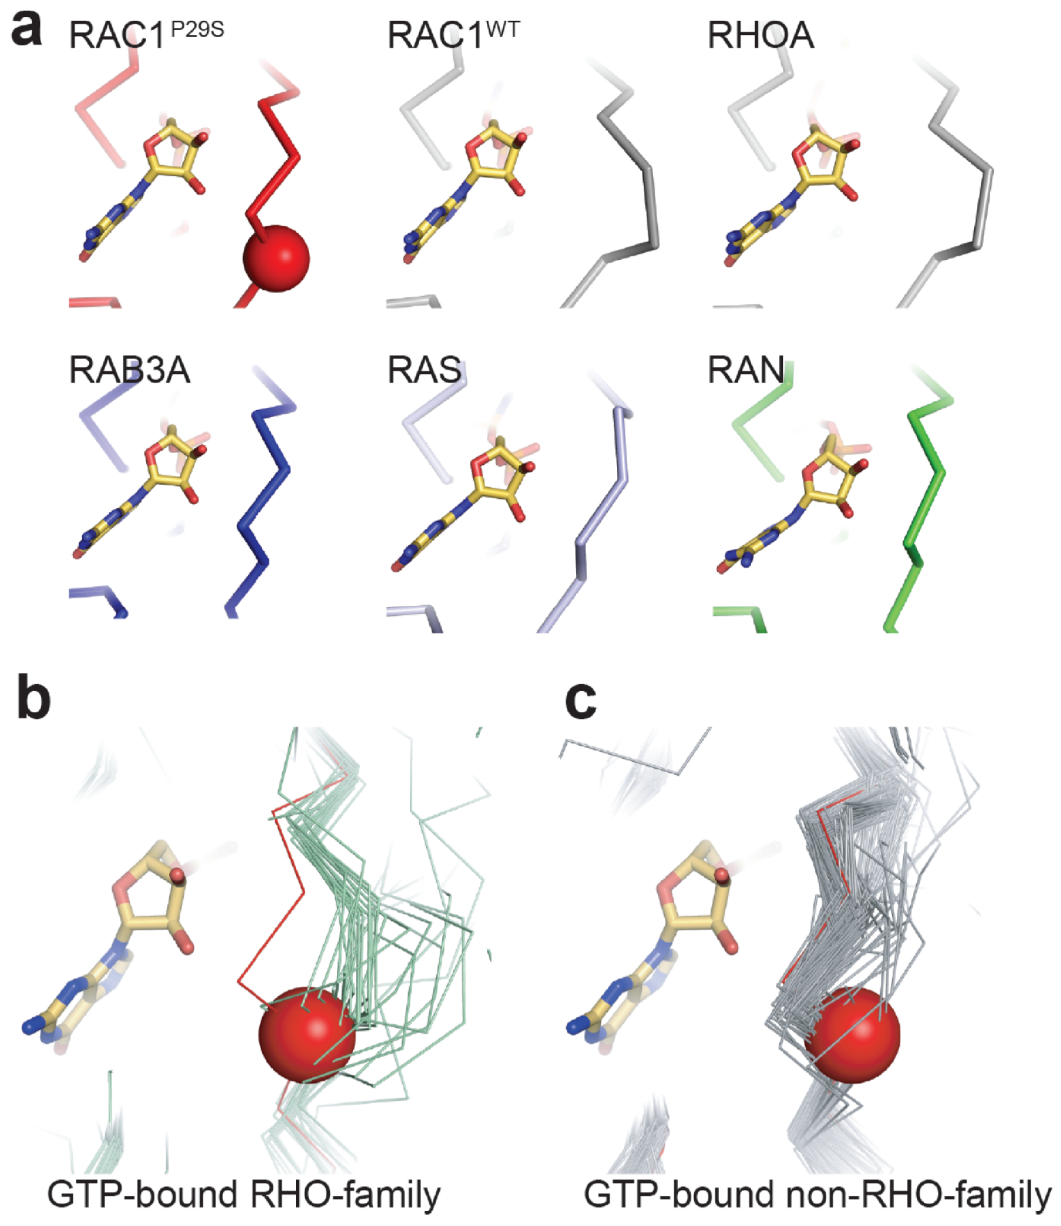

Supplementary Figure 8. Please see next page for the legend



**Supplementary Figure 8. Switch I conformations.** **a**, Comparison of carbon-alpha trace for representative GTP-bound, or GTP-analogue-bound GTPase crystal structures superposed onto the RAC1<sup>P29S</sup> crystal structure. RAC1<sup>WT</sup>, RHOA1 (1A2B), RAB3A (3RAB), RAS (5P21) and RAN (1RRP) shown. PDB ID in parentheses. Location of RAC1 P29S is shown as a red sphere. **b**, Superposition of representative GTP-bound, or GTP-analogue-bound, RHO family GTPases onto the crystal structure of RAC1<sup>P29S</sup> shows that for the switch I loop of RAC1<sup>P29S</sup> is conformationally divergent. Crystal structures, 1A2B, 1AM4, 1CEE, 1CXZ, 1E0A, 1GWN, 1I4T, 1KMQ, 1M7B, 1NF3, 1RYH, 1S1C, 1Z2C, 2ATX, 2FJU, 2GCO, 2GCP, 2IC5, 2ODB, 2OV2, 2QME, 2QRZ, 2RMK, 2V55, 2W2V, 2W2X, 2WKQ, 3EG5 and 3KZ1 are shown in light green. RAC1<sup>P29S</sup> shown in red. Location of RAC1 P29S is shown as a red sphere. RHO-family GTPases that have a similar conformation to RAC1<sup>P29S</sup> are discussed in the **Supplemental Text** and are not shown here. **c**, Superposition of representative GTP-bound, or GTP-analogue-bound, non-RHO-family GTPases onto the crystal structure of RAC1<sup>P29S</sup> shows that the switch I loop of RAC1<sup>P29S</sup> adopts a similar, RAS-like, conformation. Crystal structures 121P, 1AGP, 1C1Y, 1CLU, 1CTQ, 1EK0, 1G17, 1GNP, 1GNQ, 1GNR, 1GUA, 1HE8, 1HUQ, 1IAQ, 1IBR, 1JAH, 1JAI, 1K5D, 1K8R, 1KY2, 1LF0, 1LFD, 1N6H, 1N6L, 1N6N, 1N6O, 1N6P, 1N6R, 1NVU, 1NVW, 1NVX, 1OIW, 1P2S, 1P2T, 1P2U, 1P2V, 1PLJ, 1PLK, 1QBK, 1QRA, 1R2Q, 1RRP, 1RVD, 1T91, 1TU3, 1U8Y, 1UAD, 1VG0, 1X3S, 1XCM, 1XTR, 1XTS, 1YHN, 1YU9, 1YVD, 1YZK, 1YZL, 1YZN, 1YZQ, 1YZT, 1YZU, 1Z06, 1Z07, 1Z08, 1Z0J, 1Z0K, 1ZBD, 1ZC3, 1ZC4, 1ZW6, 221P, 2BME, 2C5L, 2CL0, 2CL6, 2CL7, 2D7C, 2EVW, 2EW1, 2F9M, 2FFQ, 2FG5, 2G6B, 2GIL, 2GZD, 2GZH, 2HV8, 2OCB, 2RAP, 2RGA, 2RGB, 2RGC, 2RGD, 2RGE, 2RGG, 2UZI, 2VH5, 2X19, 2ZET, 3A6P, 3BBP, 3BC1, 3CWZ, 3DDC, 3E5H, 3GFT, 3GJX, 3I3S, 3K8Y, 3K9L, 3K9N, 3KKM, 3KKN, 3KKO, 3L8Y, 3L8Z, 3LAW, 3LBH, 3LBI, 3LBN, 3M1I, 3MJH, 3NBY, 3NBZ, 3NC0, 3NC0, 3NC1, 3NKV, 3OES, 3OIU, 3OIV, 3OIW, 3PIR, 3PIT, 3QBT, 3RAB, 3RAP, 3RAP, 421P, 521P, 5P21, 621P, 6Q21, 721P and 821P are shown in grey. RAC1<sup>P29S</sup> shown in red. Location of RAC1 P29S is shown as a red sphere. Figure made using Pymol ([www.pymol.org](http://www.pymol.org)).

**Supplementary Table 1: Characteristics of Melanoma Samples**

|                                 | Matched | Unmatched | Total |
|---------------------------------|---------|-----------|-------|
| Melanoma                        | 99      | 48        | 147   |
| Normal                          | 99      |           | 99    |
| Cells/Snap frozen tumors        |         |           |       |
| Frozen Tissue                   | 68      | 35        | 103   |
| Cell Culture                    | 31      | 13        | 44    |
| Gender                          |         |           |       |
| Male                            | 62      | 26        | 88    |
| Female                          | 37      | 22        | 59    |
| Tumor                           |         |           |       |
| Primary                         | 35      | 13        | 48    |
| Metastasis                      | 64      | 35        | 99    |
| Type                            |         |           |       |
| Hair-bearing skin (Sun-exposed) | 61      | 36        | 97    |
| Acral                           | 14      | 3         | 17    |
| Mucosal                         | 7       | 1         | 8     |
| Uveal                           | 5       | 1         | 6     |
| Unknown Primary                 | 12      | 7         | 19    |

| Gene                | Mutation    | Total | %     | Cutaneous | %     | Sun-shielded | %     |
|---------------------|-------------|-------|-------|-----------|-------|--------------|-------|
| <i>BRAF</i>         | V600E/K/R   | 49    | 33.3% | 41        | 42.3% | 0            | 0.0%  |
| <i>NRAS</i>         | Q61H/K/L//R | 24    | 16.3% | 19        | 19.6% | 1            | 3.2%  |
|                     | G12D/V      | 2     | 1.4%  | 1         | 1.0%  | 1            | 3.2%  |
|                     | G13R        | 1     | 0.7%  | 1         | 1.0%  | 0            | 0.0%  |
| <i>HRAS</i>         | Q61H        | 1     | 0.7%  | 0         | 0.0%  | 1            | 3.2%  |
| Total RAS           |             | 28    | 19.0% | 21        | 21.6% | 3            | 9.7%  |
| <i>BRAF/NRAS</i> ** | V600K/G13D  | 1     | 0.7%  | 1         | 1.0%  | 0            | 0.0%  |
| <i>NRAS/KIT</i> **  | Q61K/L160V  | 1     | 0.7%  | 1         | 1.0%  | 0            | 0.0%  |
| <i>KIT</i>          | K642E       | 1     | 0.7%  | 0         | 0.0%  | 1            | 3.2%  |
|                     | L576P       | 2     | 1.4%  | 0         | 0.0%  | 2            | 6.5%  |
|                     | N822Y       | 1     | 0.7%  | 0         | 0.0%  | 1            | 3.2%  |
|                     | V559D       | 1     | 0.7%  | 0         | 0.0%  | 1            | 3.2%  |
| Total <i>KIT</i>    |             | 5     | 3.4%  | 0         | 0.0%  | 5            | 16.1% |
| Wild Type*          |             | 63    | 42.9% | 33        | 34.0% | 23           | 74.2% |

\* Four samples showed additional somatic BRAF missense mutations: N581S, N581T, S732F, and P75L.

\*\* Samples showed non-exclusive mutations.

**Supplementary Table 2: Summary of clinical, pathological, and mutation status of melanoma samples**

| Sample  | Dataset   | Cell line / tumor | Mutation Status   | Primary or Metastasis | Type        | Location primary | Location of tumor excised | Sex | Age at Resection |
|---------|-----------|-------------------|-------------------|-----------------------|-------------|------------------|---------------------------|-----|------------------|
| YUAKER  | matched   | T                 | WT                | primary               | sun-exposed | head/neck        | head/neck                 | M   | 85               |
| YUAVEY  | matched   | C                 | <i>NRAS-Q61R</i>  | metastasis            | sun-exposed | extremity        | extremity                 | F   | 58               |
| YUBAN   | matched   | T                 | <i>BRAF-V600K</i> | metastasis            | sun-exposed | head/neck        | trunk                     | M   | 65               |
| YUBARON | matched   | T                 | WT                | primary               | sun-exposed | head/neck        | head/neck                 | M   | 68               |
| YUBATIK | unmatched | T                 | <i>BRAF-V600K</i> | metastasis            | sun-exposed | head/neck        | head/neck                 | M   | 71               |
| YUBEM   | matched   | T                 | WT                | primary               | sun-exposed | head/neck        | head/neck                 | F   | 58               |
| YUBER   | matched   | T                 | WT                | metastasis            | sun-exposed | head/neck        | lung                      | M   | 83               |
| YUBOO   | matched   | T                 | WT                | metastasis            | uveal       | choroid          | head/neck                 | F   | 56               |
| YUBOT   | matched   | T                 | <i>NRAS-Q61R</i>  | primary               | acral       | heel             | sole                      | F   | 80               |
| YUBRA   | unmatched | T                 | <i>BRAF-V600E</i> | metastasis            | unknown     | head/neck        | head/neck                 | M   | 40               |
| YUBRO   | unmatched | T                 | WT                | metastasis            | sun-exposed | extremity        | extremity                 | M   | 64               |
| YUBRUSE | matched   | C                 | <i>KIT-L576P</i>  | metastasis            | acral       | sole             | lymph node                | M   | 88               |
| YUCHIME | matched   | T                 | <i>BRAF-V600K</i> | primary               | sun-exposed | trunk            | trunk                     | M   | 83               |
| YUCHUFA | matched   | C                 | <i>NRAS-Q61R</i>  | primary               | sun-exposed | extremity        | extremity                 | F   | 73               |
| YUCINJ  | unmatched | C                 | <i>BRAF-V600E</i> | metastasis            | sun-exposed | extremity        | extremity                 | F   | 30               |
| YUCIR   | unmatched | T                 | WT                | metastasis            | unknown     | unknown          | lymph                     | M   | 50               |
| YUCLAT  | matched   | C                 | <i>BRAF-V600K</i> | metastasis            | sun-exposed | trunk            | trunk                     | M   | 65               |
| YUCOMO  | unmatched | T                 | WT                | primary               | sun-exposed | head/neck        | trunk                     | M   | 71               |
| YUCOT   | unmatched | C                 | <i>BRAF-V600E</i> | metastasis            | sun-exposed | head/neck        | extremity                 | F   | 33               |
| YUCRATE | matched   | T                 | WT                | primary               | acral       | sole             | sole                      | F   | 69               |
| YUCRENA | matched   | C                 | WT                | primary               | uveal       | choroid          | choroid                   | M   | 55               |
| YUCROFT | matched   | T                 | <i>BRAF-V600E</i> | primary               | sun-exposed | trunk            | trunk                     | M   | 54               |
| YUDAB   | matched   | T                 | WT                | primary               | sun-exposed | head/neck        | head/neck                 | F   | 73               |
| YUDARE  | matched   | T                 | <i>BRAF-V600E</i> | metastasis            | sun-exposed | trunk            | lymph                     | M   | 58               |
| YUDATE  | matched   | C                 | WT                | metastasis            | sun-exposed | trunk            | trunk                     | M   | 81               |
| YUDEDE  | matched   | C                 | <i>NRAS-Q61H</i>  | metastasis            | sun-exposed | extremity        | extremity                 | M   | 83               |
| YUDEXA  | matched   | T                 | <i>BRAF-V600E</i> | metastasis            | sun-exposed | trunk            | trunk                     | M   | 82               |
| YUDIALE | matched   | T                 | <i>BRAF-V600E</i> | metastasis            | unknown     | unknown          | lymph                     | M   | 53               |
| YUDUTY  | matched   | C                 | <i>NRAS-Q61H</i>  | metastasis            | unknown     | unknown          | trunk                     | F   | 80               |
| YUEGO   | unmatched | T                 | <i>NRAS-Q61K</i>  | metastasis            | sun-exposed | head/neck        | trunk                     | M   | 66               |
| YUESTA  | unmatched | T                 | WT                | primary               | sun-exposed | extremity        | extremity                 | F   | 51               |
| YUFARCI | matched   | T                 | <i>NRAS-Q61K</i>  | metastasis            | unknown     | unknown          | head/neck                 | M   | 54               |
| YUFAR   | unmatched | T                 | <i>BRAF-V600E</i> | metastasis            | sun-exposed | trunk            | trunk                     | M   | 48               |
| YUFISO  | matched   | T                 | <i>HRAS-Q61H</i>  | primary               | acral       | subungual        | subungual                 | M   | 43               |
| YUFLA   | matched   | T                 | <i>NRAS-Q61K</i>  | metastasis            | sun-exposed | head/neck        | head/neck                 | M   | 52               |
| YUFOLD  | matched   | T                 | <i>NRAS-Q61L</i>  | primary               | sun-exposed | extremity        | extremity                 | F   | 92               |

**Supplementary Table 2:** Summary of clinical, pathological, and mutation status of melanoma samples

| Sample  | Dataset   | Cell line / tumor | Mutation Status              | Primary or Metastasis | Type        | Location primary | Location of tumor excised | Sex | Age at Resection |
|---------|-----------|-------------------|------------------------------|-----------------------|-------------|------------------|---------------------------|-----|------------------|
| YUFOR   | unmatched | T                 | <i>NRAS-Q61L</i>             | metastasis            | sun-exposed | extremity        | lymph                     | F   | 90               |
| YUFUZZ  | matched   | T                 | WT                           | metastasis            | unknown     | unknown          | lymph                     | F   | 85               |
| YUGADID | matched   | T                 | WT                           | metastasis            | uveal       | choroid          | extremity                 | F   | 75               |
| YUGAFFE | matched   | C                 | <i>BRAF-V600K</i>            | metastasis            | sun-exposed | head/neck        | lymph                     | M   | 39               |
| YUGAL   | unmatched | T                 | WT                           | metastasis            | sun-exposed | head/neck        | head/neck                 | M   | 80               |
| YUGANK  | unmatched | C                 | <i>NRAS-Q61K</i>             | metastasis            | sun-exposed | head/neck        | brain                     | M   | 78               |
| YUGASP  | matched   | T                 | <i>NRAS-Q61L</i>             | metastasis            | sun-exposed | extremity        | lymph                     | F   | 88               |
| YUGELU  | unmatched | T                 | <i>NRAS-Q61L</i>             | metastasis            | sun-exposed | head/neck        | head/neck                 | M   | 84               |
| YUGISMO | matched   | T                 | <i>NRAS-Q61K, KIT-L160V</i>  | metastasis            | sun-exposed | trunk            | trunk                     | M   | 73               |
| YUGLAUD | unmatched | T                 | <i>NRAS-Q61K</i>             | primary               | sun-exposed | trunk            | trunk                     | M   | 57               |
| YUGLIDE | matched   | C                 | WT                           | primary               | uveal       | choroid          | choroid                   | F   | 33               |
| YUGOE   | matched   | C                 | <i>NRAS-G12V</i>             | metastasis            | sun-exposed | head/neck        | head/neck                 | M   | 54               |
| YUGONZO | matched   | T                 | WT                           | primary               | sun-exposed | extremity        | extremity                 | F   | 61               |
| YUHAY   | unmatched | T                 | <i>BRAF-V600E</i>            | primary               | sun-exposed | extremity        | extremity                 | F   | 34               |
| YUHEF   | matched   | C                 | WT                           | metastasis            | sun-exposed | head/neck        | trunk                     | M   | 53               |
| YUHIMO  | matched   | T                 | WT                           | metastasis            | acral       | heel             | extremity                 | M   | 57               |
| YUHOIN  | matched   | C                 | WT                           | metastasis            | mucosal     | nasal cavity     | lymph                     | F   | 59               |
| YUHOOD  | matched   | T                 | WT                           | metastasis            | mucosal     | gingiva          | trunk                     | M   | 75               |
| YUHUY   | matched   | T                 | <i>BRAF-V600E</i>            | metastasis            | sun-exposed | trunk            | trunk                     | M   | 64               |
| YUIRI   | matched   | T                 | WT                           | metastasis            | acral       | sole             | sole                      | F   | 25               |
| YUISKIA | matched   | T                 | WT                           | metastasis            | acral       | toe              | trunk                     | M   | 69               |
| YUJUMP  | matched   | T                 | WT                           | primary               | sun-exposed | extremity        | extremity                 | M   | 58               |
| YUKADI  | matched   | C                 | <i>BRAF-V600E</i>            | metastasis            | sun-exposed | trunk            | trunk                     | M   | 56               |
| YUKARN  | unmatched | C                 | <i>BRAF-V600K, NRAS-G13D</i> | metastasis            | sun-exposed | trunk            | lymph                     | F   | 86               |
| YUKAY   | unmatched | T                 | WT                           | metastasis            | unknown     | unknown          | trunk                     | F   | 47               |
| YUKERE  | unmatched | T                 | WT                           | primary               | mucosal     | vulva            | vulva                     | F   | 89               |
| YUKIL   | matched   | T                 | <i>BRAF-V600E</i>            | metastasis            | sun-exposed | head/neck        | extremity                 | M   | 73               |
| YUKLAB  | matched   | T                 | WT                           | metastasis            | sun-exposed | unknown          | trunk                     | M   | 84               |
| YUKNOLL | unmatched | T                 | WT                           | metastasis            | unknown     | unknown          | liver                     | F   | 81               |
| YUKOLI  | unmatched | C                 | <i>BRAF-V600E</i>            | metastasis            | sun-exposed | trunk            | trunk                     | M   | 53               |
| YUKOS   | unmatched | T                 | WT                           | primary               | sun-exposed | trunk            | trunk                     | M   | 87               |
| YUKRIN  | matched   | T                 | WT                           | metastasis            | sun-exposed | trunk            | brain                     | F   | 37               |
| YULAC   | unmatched | C                 | <i>BRAF-V600K</i>            | metastasis            | sun-exposed | trunk            | head/neck                 | F   | 65               |
| YULAN   | matched   | T                 | WT                           | metastasis            | sun-exposed | head/neck        | lymph                     | M   | 81               |

**Supplementary Table 2:** Summary of clinical, pathological, and mutation status of melanoma samples

| Sample  | Dataset   | Cell line / tumor | Mutation Status   | Primary or Metastasis | Type        | Location primary | Location of tumor excised | Sex | Age at Resection |
|---------|-----------|-------------------|-------------------|-----------------------|-------------|------------------|---------------------------|-----|------------------|
| YULAPE  | matched   | C                 | <i>NRAS-Q61H</i>  | metastasis            | unknown     | unknown          | trunk                     | M   | 75               |
| YULAXER | matched   | C                 | <i>NRAS-Q61K</i>  | metastasis            | sun-exposed | trunk            | lymph                     | F   | 60               |
| YULLON  | matched   | T                 | <i>NRAS-Q61H</i>  | metastasis            | unknown     | unknown          | brain                     | F   | 56               |
| YULOMA  | matched   | C                 | <i>NRAS-Q61R</i>  | metastasis            | sun-exposed | extremity        | trunk                     | M   | 62               |
| YULOVY  | unmatched | C                 | <i>NRAS-Q61L</i>  | primary               | sun-exposed | extremity        | extremity                 | F   | 83               |
| YULVER  | matched   | T                 | WT                | metastasis            | sun-exposed | head/neck        | lung                      | M   | 64               |
| YUMAC   | unmatched | C                 | <i>BRAF-V600K</i> | metastasis            | sun-exposed | extremity        | extremity                 | M   | 53               |
| YUMAN   | unmatched | T                 | <i>NRAS-G13R</i>  | metastasis            | sun-exposed | trunk            | lymph                     | F   | 77               |
| YUMER   | matched   | T                 | WT                | metastasis            | sun-exposed | head/neck        | head/neck                 | M   | 94               |
| YUMINE  | unmatched | C                 | <i>BRAF-V600E</i> | metastasis            | unknown     | unknown          | liver                     | F   | 59               |
| YUMOOK  | matched   | T                 | <i>BRAF-V600E</i> | primary               | sun-exposed | extremity        | extremity                 | F   | 75               |
| YUMOYA  | matched   | T                 | <i>BRAF-V600E</i> | primary               | sun-exposed | trunk            | trunk                     | M   | 58               |
| YUMUDE  | matched   | T                 | <i>KIT-V559D</i>  | primary               | acral       | sole             | sole                      | M   | 79               |
| YUMUT   | matched   | C                 | <i>BRAF-V600E</i> | metastasis            | sun-exposed | extremity        | trunk                     | M   | 44               |
| YUNACK  | matched   | T                 | <i>BRAF-V600E</i> | primary               | sun-exposed | trunk            | trunk                     | F   | 59               |
| YUNELU  | unmatched | T                 | <i>NRAS-Q61R</i>  | metastasis            | sun-exposed | extremity        | extremity                 | F   | 81               |
| YUNEON  | matched   | T                 | WT                | primary               | acral       | sole             | sole                      | M   | 68               |
| YUNICA  | matched   | T                 | WT                | metastasis            | mucosal     | vulva            | liver                     | F   | 63               |
| YUNOCA  | matched   | T                 | WT                | primary               | mucosal     | nasal cavity     | mucosal                   | F   | 53               |
| YUNUFF  | matched   | C                 | <i>BRAF-V600E</i> | metastasis            | sun-exposed | trunk            | pleural cavity            | F   | 59               |
| YUNUVO  | matched   | T                 | WT                | primary               | acral       | sole             | sole                      | M   | 64               |
| YUPADI  | unmatched | T                 | WT                | primary               | sun-exposed | head/neck        | head/neck                 | M   | 86               |
| YUPAF   | unmatched | T                 | <i>BRAF-V600K</i> | metastasis            | unknown     | unknown          | chest wall                | M   | 63               |
| YUPAL   | matched   | T                 | WT                | primary               | sun-exposed | head/neck        | head/neck                 | M   | 64               |
| YUPANG  | unmatched | T                 | WT                | metastasis            | acral       | sole             | sole                      | M   | 81               |
| YUPAT   | matched   | T                 | WT                | metastasis            | sun-exposed | trunk            | lung                      | M   | 52               |
| YUPEET  | matched   | C                 | <i>BRAF-V600E</i> | primary               | sun-exposed | trunk            | trunk                     | M   | 54               |
| YUPER   | matched   | T                 | <i>BRAF-V600E</i> | metastasis            | sun-exposed | trunk            | extremity                 | M   | 63               |
| YUPORCH | matched   | T                 | WT                | metastasis            | unknown     | unknown          | intestine                 | F   | 75               |
| YUPROST | matched   | T                 | WT                | primary               | sun-exposed | head/neck        | head/neck                 | F   | 86               |
| YUPRO   | matched   | T                 | <i>BRAF-V600K</i> | primary               | sun-exposed | extremity        | extremity                 | M   | 53               |
| YUPYKO  | matched   | T                 | WT                | primary               | sun-exposed | head/neck        | head/neck                 | M   | 63               |
| YURDE   | matched   | C                 | <i>BRAF-V600E</i> | metastasis            | sun-exposed | sun-exposed      | trunk                     | M   | 55               |
| YURED   | matched   | C                 | <i>BRAF-V600E</i> | metastasis            | sun-exposed | extremity        | trunk                     | F   | 67               |
| YURIDA  | matched   | T                 | <i>NRAS-Q61R</i>  | metastasis            | sun-exposed | head/neck        | head/neck                 | M   | 61               |
| YURIF   | matched   | C                 | <i>BRAF-V600K</i> | metastasis            | sun-exposed | extremity        | extremity                 | M   | 53               |

**Supplementary Table 2:** Summary of clinical, pathological, and mutation status of melanoma samples

| Sample | Dataset   | Cell line / tumor | Mutation Status   | Primary or Metastasis | Type        | Location primary | Location of tumor excised | Sex | Age at Resection |
|--------|-----------|-------------------|-------------------|-----------------------|-------------|------------------|---------------------------|-----|------------------|
| YURIMO | unmatched | T                 | WT                | primary               | sun-exposed | head/neck        | head/neck                 | M   | 87               |
| YURKEN | matched   | C                 | <i>BRAF-V600E</i> | metastasis            | sun-exposed | trunk            | lymph                     | F   | 52               |
| YUROO  | unmatched | T                 | WT                | metastasis            | sun-exposed | unknown          | extremity                 | M   | 64               |
| YURTHE | matched   | T                 | WT                | metastasis            | unknown     | unknown          | lymph                     | F   | 81               |
| YURUB  | matched   | T                 | <i>KIT-N822Y</i>  | metastasis            | acral       | toe              | lymph                     | M   | 71               |
| YURUS  | matched   | T                 | WT                | primary               | sun-exposed | extremity        | extremity                 | M   | 90               |
| YUSAG  | matched   | T                 | <i>KIT-K642E</i>  | metastasis            | acral       | finger           | finger                    | F   | 77               |
| YUSAN  | matched   | C                 | <i>NRAS-G12D</i>  | metastasis            | mucosal     | vulva            | trunk                     | F   | 58               |
| YUSARI | matched   | C                 | <i>BRAF-V600E</i> | metastasis            | sun-exposed | head/neck        | pleural fluid             | M   | 49               |
| YUSAT  | unmatched | T                 | <i>BRAF-V600E</i> | metastasis            | sun-exposed | head/neck        | head/neck                 | F   | 31               |
| YUSCH  | unmatched | T                 | <i>KIT-L576P</i>  | metastasis            | acral       | thumb            | thumb                     | M   | 64               |
| YUSCO  | matched   | T                 | <i>BRAF-V600E</i> | primary               | sun-exposed | trunk            | lymph                     | F   | 65               |
| YUSEL  | matched   | T                 | <i>BRAF-V600K</i> | metastasis            | unknown     | unknown          | lymph                     | M   | 53               |
| YUSIK  | unmatched | C                 | <i>BRAF-V600E</i> | metastasis            | sun-exposed | extremity        | trunk                     | F   | 50               |
| YUSOT  | matched   | T                 | WT                | metastasis            | mucosal     | nasal cavity     | gall bladder              | F   | 70               |
| YUSTE  | unmatched | C                 | <i>BRAF-V600E</i> | metastasis            | sun-exposed | extremity        | extremity                 | F   | 66               |
| YUSUBA | matched   | C                 | <i>BRAF-V600E</i> | metastasis            | sun-exposed | trunk            | trunk                     | F   | 37               |
| YUSWI  | matched   | C                 | <i>BRAF-V600E</i> | metastasis            | sun-exposed | trunk            | small intestine           | M   | 57               |
| YUTALO | unmatched | T                 | <i>BRAF-V600E</i> | metastasis            | sun-exposed | trunk            | trunk                     | F   | 46               |
| YUTAZI | unmatched | T                 | WT                | metastasis            | unknown     | unknown          | brain                     | F   | 51               |
| YUTEL  | unmatched | T                 | WT                | primary               | sun-exposed | extremity        | extremity                 | F   | 81               |
| YUTEPA | matched   | T                 | <i>NRAS-Q61R</i>  | primary               | sun-exposed | trunk            | trunk                     | M   | 56               |
| YUTER  | unmatched | C                 | <i>NRAS-Q61L</i>  | metastasis            | sun-exposed | extremity        | extremity                 | M   | 73               |
| YUTOGS | unmatched | T                 | WT                | primary               | sun-exposed | head/neck        | head/neck                 | M   | 50               |
| YUTOLL | unmatched | T                 | <i>BRAF-V600K</i> | metastasis            | sun-exposed | trunk            | trunk                     | M   | 67               |
| YUTRE  | matched   | T                 | WT                | metastasis            | acral       | thumb            | thumb                     | M   | 81               |
| YUTRIP | matched   | T                 | WT                | primary               | acral       | sole             | sole                      | M   | 78               |
| YUVAIL | matched   | T                 | <i>BRAF-V600K</i> | primary               | sun-exposed | trunk            | trunk                     | F   | 62               |
| YUVAN  | unmatched | T                 | WT                | metastasis            | uveal       | choroid          | trunk                     | F   | 68               |
| YUVEDO | matched   | T                 | WT                | primary               | uveal       | choroid          | trunk                     | M   | 48               |
| YUVIL  | unmatched | T                 | WT                | metastasis            | sun-exposed | extremity        | extremity                 | F   | 50               |
| YUWAGE | matched   | C                 | WT                | primary               | sun-exposed | head/neck        | trunk                     | M   | 86               |
| YUWALI | matched   | C                 | <i>BRAF-V600E</i> | metastasis            | unknown     | unknown          | lymph                     | M   | 41               |
| YUWAND | matched   | T                 | WT                | primary               | sun-exposed | head/neck        | head/neck                 | M   | 78               |
| YUWHIM | matched   | C                 | <i>BRAF-V600E</i> | metastasis            | unknown     | unknown          | trunk                     | M   | 65               |
| YUWIC  | unmatched | T                 | WT                | primary               | acral       | thumb            | thumb                     | M   | 40               |

**Supplementary Table 2:** Summary of clinical, pathological, and mutation status of melanoma samples

| Sample | Dataset   | Cell line / tumor | Mutation Status   | Primary or Metastasis | Type        | Location primary | Location of tumor excised | Sex | Age at Resection |
|--------|-----------|-------------------|-------------------|-----------------------|-------------|------------------|---------------------------|-----|------------------|
| YUWISE | matched   | T                 | WT                | metastasis            | mucosal     | anus             | pleural fluid             | F   | 63               |
| YUXALT | unmatched | T                 | WT                | primary               | sun-exposed | head/neck        | head/neck                 | M   | 86               |
| YUZEAL | unmatched | C                 | <i>BRAF-V600R</i> | metastasis            | sun-exposed | trunk            | pleural fluid             | M   | 78               |
| YUZEST | matched   | T                 | <i>BRAF-V600E</i> | metastasis            | unknown     | unknown          | trunk                     | M   | 55               |
| YUZINO | matched   | T                 | <i>NRAS-Q61L</i>  | metastasis            | sun-exposed | extremity        | extremity                 | F   | 80               |

### Supplementary Table 3: Mutation rates by sequence context

| Sequence context      | Number of sites per exome | Mutation frequency |
|-----------------------|---------------------------|--------------------|
| Any                   | 2.98E+07                  | 1.92E-05           |
| TC*                   | 2.88E+06                  | 5.53E-05           |
| CC*                   | 3.18E+06                  | 2.59E-05           |
| AC*                   | 2.33E+06                  | 5.64E-06           |
| GC*                   | 2.70E+06                  | 6.48E-06           |
| Other dinucleotides   | 1.87E+07                  | 1.61E-05           |
| TTTC*CT               | 3.49E+04                  | 1.93E-04           |
| CTTC*CT               | 3.59E+04                  | 1.41E-04           |
| ATTC*CT               | 1.84E+04                  | 1.26E-04           |
| GTTC*CT               | 1.65E+04                  | 1.28E-04           |
| TTTC*GT               | 3.38E+03                  | 5.83E-04           |
| CTTC*GT               | 5.08E+03                  | 4.12E-04           |
| ATTC*GT               | 2.54E+03                  | 4.07E-04           |
| GTTC*GT               | 2.42E+03                  | 3.93E-04           |
| Other hexanucleotides | 2.97E+07                  | 1.86E-05           |

The mutation-site motif was determined from the frequency of individual sequence contexts flanking high quality somatic mutations in the exome capture region.



**Supplementary Table 4: Novel recurrent somatic SNVs across the melanoma exome screen**

| Gene Symbol      | Accession      | Chr   | Position  | Reference Genotype | Variant Genotype | Amino Acid Change | Total | Expression | COSMIC | PhyloP Cons. Score | p-fam domain  |
|------------------|----------------|-------|-----------|--------------------|------------------|-------------------|-------|------------|--------|--------------------|---------------|
| <i>RAC1</i>      | NM_018890.3    | chr7  | 6426892   | C/C                | C/T              | P29S              | 7     | +          | Y      | 6.25               | Ras           |
| <i>DBC1</i>      | NM_014618.2    | chr9  | 121929759 | C/C                | C/T T/T          | R630Q             | 6     | +          | Y      | 5.76               |               |
| <i>CAPN6</i>     | NM_014289.3    | chrX  | 110496372 | G/G                | G/A A/A          | R124C             | 4     | +          | N      | 4.17               | Peptidase_C2  |
| <i>LOXHD1</i>    | NM_144612.6    | chr18 | 44114381  | G/G                | G/A              | R1377W            | 4     | -          | N      | 2.84               | PLAT          |
| <i>OR4N2</i>     | NM_001004723.1 | chr14 | 20295729  | G/G                | G/A              | G41E              | 4     | -          | N      | 1.97               | 7tm_1         |
| <i>OR5T2</i>     | NM_001004746.1 | chr11 | 56000423  | C/C                | C/T              | G80E              | 4     | -          | Y      | 4.50               | 7tm_1         |
| <i>PCDHGA1</i>   | NM_018912.2    | chr5  | 140711128 | C/C                | C/T              | R293C             | 4     | +          | Y      | 0.43               | Cadherin      |
| <i>PPP6C</i>     | NM_001123355.1 | chr9  | 127912080 | G/G                | G/A              | R301C             | 4     | +          | N      | 3.81               |               |
| <i>PRIMA1</i>    | NM_178013.3    | chr14 | 94187873  | C/C                | C/T              | E127K             | 4     | -          | Y      | 2.74               |               |
| <i>RGS7</i>      | NM_002924.4    | chr1  | 241262011 | G/G                | G/A              | R44C              | 4     | +          | N      | 4.94               | DEP           |
| <i>SERPINA10</i> | NM_016186.2    | chr14 | 94754734  | C/C                | C/T              | G294E             | 4     | -          | N      | 2.16               | Serpin        |
| <i>SNCAIP</i>    | NM_005460.2    | chr5  | 121786742 | C/C                | C/T              | P734S             | 4     | -          | N      | 3.91               |               |
| <i>TMC5</i>      | NM_001105248.1 | chr16 | 19485576  | G/G                | G/A              | E690K             | 4     | -          | N      | 0.28               | Sugar_tr      |
| <i>TP53</i>      | NM_001126112.1 | chr17 | 7574003   | G/G                | G/A A/A          | R342X             | 4     | +          | Y      | 0.84               |               |
| <i>ACVR1C</i>    | NM_145259.2    | chr2  | 158395120 | G/G                | G/A              | R441X             | 3     | +          | N      | 1.10               |               |
| <i>ADCY8</i>     | NM_001115.2    | chr8  | 131792904 | C/C                | C/T              | G1163E            | 3     | -          | N      | 5.79               | Guanylate_cyc |
| <i>ANK3</i>      | NM_020987.3    | chr10 | 62023696  | C/C                | C/T              | G199E             | 3     | -          | N      | 5.94               |               |
| <i>C15orf2</i>   | NM_018958.2    | chr15 | 24922056  | C/C                | C/T              | R348X             | 3     | +          | N      | -0.03              |               |
| <i>C1orf150</i>  | NM_145278.3    | chr1  | 247712498 | G/G                | G/A              | G2E               | 3     | -          | N      | 2.20               |               |
| <i>C1orf168</i>  | NM_001004303.4 | chr1  | 57233561  | G/G                | G/A              | S335L             | 3     | -          | N      | 2.97               |               |
| <i>C6</i>        | NM_001115131.1 | chr5  | 41199882  | G/G                | G/A              | R145C             | 3     | -          | N      | 1.76               | Ldl_recept_a  |
| <i>C6</i>        | NM_001115131.1 | chr5  | 41161920  | G/G                | G/A              | R445X             | 3     | -          | N      | 1.06               |               |
| <i>CCDC60</i>    | NM_178499.3    | chr12 | 119866561 | G/G                | G/A              | R55Q              | 3     | +          | N      | 2.79               |               |
| <i>CD1C</i>      | NM_001765.2    | chr1  | 158261016 | G/G                | G/A              | E52K              | 3     | -          | N      | 0.94               | MHC_I         |
| <i>CDH6</i>      | NM_004932.2    | chr5  | 31317540  | C/C                | C/T              | S524L             | 3     | -          | N      | 3.45               | Cadherin      |
| <i>CDH9</i>      | NM_016279.3    | chr5  | 26885885  | C/C                | C/T              | D574N             | 3     | -          | N      | 4.03               | Cadherin      |
| <i>CFHR3</i>     | NM_021023.5    | chr1  | 196748927 | G/G                | G/A A/A          | R85K              | 3     | +          | N      | 0.24               |               |
| <i>CYP2C8</i>    | NM_000770.3    | chr10 | 96798741  | G/G                | G/A              | P402S             | 3     | -          | N      | 0.27               | p450          |
| <i>DBC1</i>      | NM_014618.2    | chr9  | 122075525 | C/C                | C/T              | E37K              | 3     | +          | N      | 3.69               |               |
| <i>DGKI</i>      | NM_004717.2    | chr7  | 137206693 | G/G                | G/A              | R723C             | 3     | +          | N      | 3.40               |               |
| <i>DNAH5</i>     | NM_001369.2    | chr5  | 13753355  | C/C                | C/T              | R3620Q            | 3     | -          | N      | -0.93              |               |

**Supplementary Table 4: Novel recurrent somatic SNVs across the melanoma exome screen**

| Gene Symbol      | Accession      | Chr   | Position  | Reference Genotype | Variant Genotype | Amino Acid Change | Total | Expression | COSMIC | Phylop Cons. Score | p-fam domain  |
|------------------|----------------|-------|-----------|--------------------|------------------|-------------------|-------|------------|--------|--------------------|---------------|
| <i>DNAH5</i>     | NM_001369.2    | chr5  | 13885322  | C/C                | C/T              | G920E             | 3     | -          | N      | 0.23               |               |
| <i>DNAH5</i>     | NM_001369.2    | chr5  | 13692194  | G/G                | G/A              | R4592X            | 3     | -          | N      | 4.14               |               |
| <i>DNAH5</i>     | NM_001369.2    | chr5  | 13753599  | G/G                | G/A              | R3539C            | 3     | -          | N      | 6.31               |               |
| <i>DYNC111</i>   | NM_004411.4    | chr7  | 95726852  | C/C                | C/T              | R629C             | 3     | +          | N      | 5.14               |               |
| <i>E2F1</i>      | NM_005225.2    | chr20 | 32267771  | G/G                | G/A              | S121F             | 3     | +          | N      | 4.16               |               |
| <i>GABRB2</i>    | NM_021911.2    | chr5  | 160886715 | C/C                | C/T              | D125N             | 3     | -          | N      | 5.91               | Neur_chan_LB  |
| <i>GIMAP7</i>    | NM_153236.3    | chr7  | 150217300 | G/G                | G/A              | E80K              | 3     | +          | N      | 2.87               | AIG1          |
| <i>GPR20</i>     | NM_005293.2    | chr8  | 142366972 | G/G                | G/A              | A351V             | 3     | -          | N      | 1.36               |               |
| <i>GRID2</i>     | NM_001510.2    | chr4  | 94344033  | G/G                | G/A              | E487K             | 3     | +          | N      | 5.95               | Lig_chan-Glu_ |
| <i>ISX</i>       | NM_001008494.1 | chr22 | 35478537  | C/C                | C/T              | R86C              | 3     | -          | N      | 1.47               | Homeobox      |
| <i>KCNH7</i>     | NM_033272.3    | chr2  | 163302566 | G/G                | G/A              | P506S             | 3     | +          | N      | 6.13               | Ion_trans     |
| <i>KCNH7</i>     | NM_033272.3    | chr2  | 163241264 | C/C                | C/T              | D966N             | 3     | +          | N      | -1.20              |               |
| <i>KCNT2</i>     | NM_198503.2    | chr1  | 196398861 | C/C                | C/T              | R222Q             | 3     | -          | N      | 5.56               | Ion_trans_2   |
| <i>KIAA1324L</i> | NM_001142749.2 | chr7  | 86509846  | C/C                | C/T              | E1011K            | 3     | +          | N      | 4.15               |               |
| <i>KL</i>        | NM_004795.3    | chr13 | 33628324  | G/G                | G/A              | E414K             | 3     | -          | N      | 4.37               |               |
| <i>LRP2</i>      | NM_004525.2    | chr2  | 170014006 | C/C                | C/T              | G3965E            | 3     | +          | N      | 2.89               |               |
| <i>MSR1</i>      | NM_138715.2    | chr8  | 16026278  | C/C                | C/T              | E107K             | 3     | -          | Y      | 0.31               |               |
| <i>MSR1</i>      | NM_138715.2    | chr8  | 16026295  | C/C                | C/T              | G101E             | 3     | -          | N      | 0.42               |               |
| <i>NELL1</i>     | NM_006157.3    | chr11 | 21581830  | C/C                | C/T              | P628S             | 3     | +          | N      | 1.86               | EGF_CA        |
| <i>NETO1</i>     | NM_138966.3    | chr18 | 70526090  | C/C                | C/T              | G147E             | 3     | -          | N      | 5.82               | CUB           |
| <i>NR3C2</i>     | NM_000901.4    | chr4  | 149356367 | G/G                | G/A              | S549F             | 3     | +          | N      | 2.77               |               |
| <i>NRG3</i>      | NM_001165972.1 | chr10 | 84744883  | G/G                | G/A              | R537Q             | 3     | +          | N      | 1.83               | Neuregulin    |
| <i>OPN5</i>      | NM_181744.3    | chr6  | 47759679  | G/G                | G/A              | R131Q             | 3     | -          | N      | 5.55               | 7tm_1         |
| <i>OR13C8</i>    | NM_001004483.1 | chr9  | 107332146 | G/G                | G/A              | G233E             | 3     | -          | Y      | 3.64               | 7tm_1         |
| <i>OR4A15</i>    | NM_001005275.1 | chr11 | 55135452  | G/G                | G/A              | M31I              | 3     | -          | Y      | 2.73               |               |
| <i>OR4K1</i>     | NM_001004063.2 | chr14 | 20404475  | C/C                | C/T              | S217F             | 3     | -          | N      | 1.92               | 7tm_1         |
| <i>OR4M1</i>     | NM_001005500.1 | chr14 | 20249284  | C/C                | C/T              | S268F             | 3     | +          | N      | 3.21               | 7tm_1         |
| <i>OR6C1</i>     | NM_001005182.1 | chr12 | 55714592  | C/C                | C/T              | S70L              | 3     | -          | N      | 0.96               | 7tm_1         |
| <i>PAH</i>       | NM_000277.1    | chr12 | 103288633 | C/C                | C/T              | E78K              | 3     | -          | N      | 4.19               | ACT           |
| <i>PRSS58</i>    | NM_001001317.3 | chr7  | 141955085 | C/C                | C/T              | E76K              | 3     | -          | N      | 3.83               | Trypsin       |
| <i>RICTOR</i>    | NM_152756.3    | chr5  | 38950699  | G/G                | G/A              | S1084L            | 3     | +          | N      | 5.51               |               |

**Supplementary Table 4: Novel recurrent somatic SNVs across the melanoma exome screen**

| Gene Symbol    | Accession   | Chr   | Position  | Reference Genotype | Variant Genotype | Amino Acid Change | Total | Expression | COSMIC | Phylop Cons. Score | p-fam domain |
|----------------|-------------|-------|-----------|--------------------|------------------|-------------------|-------|------------|--------|--------------------|--------------|
| <i>RNF217</i>  | NM_152553.2 | chr6  | 125397950 | C/C                | C/T              | R185C             | 3     | +          | N      | 4.29               |              |
| <i>RQCD1</i>   | NM_005444.1 | chr2  | 219449406 | C/C CC/CC          | CC/TT C/T        | P131L             | 3     | +          | N      | 6.04               | Rcd1         |
| <i>S100A7</i>  | NM_002963.3 | chr1  | 153430314 | C/C                | C/T              | G92R              | 3     | -          | N      | 0.45               |              |
| <i>SLC22A2</i> | NM_003058.3 | chr6  | 160671634 | G/G                | G/A A/A          | R207C             | 3     | -          | N      | 3.66               |              |
| <i>SLC27A6</i> | NM_014031.3 | chr5  | 128368943 | G/G                | G/A              | D610N             | 3     | -          | N      | 0.63               |              |
| <i>STAC</i>    | NM_003149.1 | chr3  | 36484932  | G/G                | G/A A/A          | R63Q              | 3     | -          | N      | 1.68               |              |
| <i>TRIM58</i>  | NM_015431.3 | chr1  | 248039730 | G/G                | G/A              | G467E             | 3     | +          | N      | -0.03              |              |
| <i>TSHZ2</i>   | NM_173485.5 | chr20 | 51871450  | G/G                | G/A              | E485K             | 3     | +          | N      | 4.25               |              |
| <i>TUBA3C</i>  | NM_006001.2 | chr13 | 19751395  | C/C                | C/T              | R243Q             | 3     | +          | N      | 1.36               | Tubulin      |
| <i>UPB1</i>    | NM_016327.2 | chr22 | 24909338  | G/G                | G/A              | R169Q             | 3     | -          | N      | 5.62               | CN_hydrolase |
| <i>WDR49</i>   | NM_178824.3 | chr3  | 167293784 | C/C                | C/T              | M136I             | 3     | -          | N      | 2.40               |              |
| <i>WNK3</i>    | NM_020922.4 | chrX  | 54263821  | G/G                | G/A A/A          | S1393L            | 3     | +          | N      |                    |              |
| <i>ZNF385D</i> | NM_024697.2 | chr3  | 21462821  | C/C                | C/T              | R358Q             | 3     | -          | N      | 2.99               |              |
| <i>ZNF536</i>  | NM_014717.1 | chr19 | 30936347  | G/G                | G/A              | M626I             | 3     | -          | N      | 0.42               |              |

## Supplementary Table 5: Significantly mutated genes in sun-exposed melanomas

### a) Comprehensive Model (BH P-value <0.05)

|    | Gene Symbol     | Expression | Effective Length | Mutated Sample Count | Nonsynonymous SNV Count | Synonymous SNV Count | SNV LOH Fraction | Mean Gene PhyloP | Mean SNV PhyloP | Pvalue   | BH Pvalue | BF Pvalue |
|----|-----------------|------------|------------------|----------------------|-------------------------|----------------------|------------------|------------------|-----------------|----------|-----------|-----------|
| 1  | <i>BRAF</i>     | +          | 2290             | 28                   | 36                      | 0                    | 0.25             | 3.43             | 5.46            | 6.65E-47 | 3.48E-43  | 1.05E-42  |
| 2  | <i>NRAS</i>     | +          | 565              | 13                   | 13                      | 0                    | 0.54             | 3.63             | 4.96            | 1.27E-21 | 4.99E-18  | 1.99E-17  |
| 3  | <i>DCC</i>      | +          | 4171             | 21                   | 35                      | 6                    | 0.09             | 2.80             | 4.25            | 2.02E-12 | 6.34E-09  | 3.17E-08  |
| 4  | <i>FAM5C</i>    | -          | 1886             | 14                   | 19                      | 2                    | 0.16             | 2.84             | 4.39            | 1.63E-10 | 4.28E-07  | 2.57E-06  |
| 5  | <i>ADAM7</i>    | -          | 2213             | 14                   | 20                      | 2                    | 0.20             | 0.95             | 1.30            | 1.92E-09 | 3.88E-06  | 3.02E-05  |
| 6  | <i>TNC</i>      | +          | 5819             | 11                   | 20                      | 2                    | 0.05             | 2.21             | 3.72            | 1.98E-09 | 3.88E-06  | 3.1E-05   |
| 7  | <i>TP53</i>     | +          | 1112             | 9                    | 9                       | 0                    | 0.56             | 1.27             | 2.63            | 5.04E-08 | 8.8E-05   | 7.92E-04  |
| 8  | <i>PTPRK</i>    | +          | 4118             | 12                   | 17                      | 1                    | 0.18             | 3.25             | 4.95            | 1.37E-07 | 2.16E-04  | 2.16E-03  |
| 9  | <i>PPP6C</i>    | +          | 928              | 8                    | 9                       | 0                    | 0.33             | 3.06             | 4.10            | 1.61E-07 | 2.17E-04  | 2.52E-03  |
| 10 | <i>TLR4</i>     | +          | 1802             | 8                    | 10                      | 2                    | 0.00             | 1.03             | 0.71            | 1.65E-07 | 2.17E-04  | 2.6E-03   |
| 11 | <i>DSG4</i>     | -          | 2816             | 13                   | 22                      | 3                    | 0.14             | 1.50             | 1.98            | 2E-07    | 2.42E-04  | 3.15E-03  |
| 12 | <i>CD163L1</i>  | +          | 3877             | 15                   | 24                      | 2                    | 0.04             | 0.56             | 0.79            | 2.85E-07 | 3.2E-04   | 4.48E-03  |
| 13 | <i>FAM83B</i>   | -          | 2172             | 12                   | 18                      | 2                    | 0.17             | 1.78             | 2.71            | 3.24E-07 | 3.39E-04  | 5.09E-03  |
| 14 | <i>TNR</i>      | -          | 3753             | 13                   | 22                      | 6                    | 0.14             | 2.62             | 3.24            | 4.36E-07 | 4.28E-04  | 6.85E-03  |
| 15 | <i>GRM3</i>     | +          | 2124             | 12                   | 15                      | 2                    | 0.27             | 3.11             | 3.72            | 6.43E-07 | 5.95E-04  | 0.01      |
| 16 | <i>C6</i>       | -          | 2726             | 15                   | 18                      | 3                    | 0.06             | 1.57             | 1.42            | 1.21E-06 | 1.05E-03  | 0.02      |
| 17 | <i>GRIN3A</i>   | -          | 2727             | 9                    | 15                      | 3                    | 0.00             | 2.70             | 4.16            | 2.4E-06  | 1.98E-03  | 0.04      |
| 18 | <i>CASR</i>     | -          | 2487             | 10                   | 14                      | 5                    | 0.07             | 2.69             | 2.82            | 6.3E-06  | 4.23E-03  | 0.1       |
| 19 | <i>OR4K15</i>   | -          | 741              | 7                    | 8                       | 0                    | 0.13             | 0.78             | 1.29            | 6.45E-06 | 4.23E-03  | 0.1       |
| 20 | <i>SI</i>       | -          | 5435             | 16                   | 30                      | 5                    | 0.17             | 1.72             | 2.57            | 9.5E-06  | 5.79E-03  | 0.15      |
| 21 | <i>TPTE</i>     | -          | 1512             | 12                   | 12                      | 2                    | 0.08             | 0.59             | 1.06            | 9.58E-06 | 5.79E-03  | 0.15      |
| 22 | <i>CD163</i>    | -          | 3000             | 13                   | 21                      | 6                    | 0.10             | 1.27             | 1.32            | 1.33E-05 | 7.44E-03  | 0.21      |
| 23 | <i>C15orf2</i>  | +          | 2248             | 13                   | 17                      | 4                    | 0.12             | -0.29            | -0.16           | 1.37E-05 | 7.44E-03  | 0.22      |
| 24 | <i>WDR49</i>    | -          | 2031             | 9                    | 12                      | 1                    | 0.17             | 1.22             | 1.98            | 1.55E-05 | 8.1E-03   | 0.24      |
| 25 | <i>SLC15A2</i>  | +          | 2186             | 11                   | 14                      | 1                    | 0.07             | 2.02             | 3.52            | 1.67E-05 | 8.19E-03  | 0.26      |
| 26 | <i>C1orf168</i> | -          | 1914             | 12                   | 14                      | 4                    | 0.14             | 0.61             | 0.60            | 2.05E-05 | 8.96E-03  | 0.32      |
| 27 | <i>CAPZA3</i>   | -          | 606              | 8                    | 8                       | 1                    | 0.25             | 1.19             | 2.43            | 2.96E-05 | 0.01      | 0.47      |
| 28 | <i>RAC1</i>     | +          | 607              | 6                    | 6                       | 0                    | 0.17             | 3.48             | 6.27            | 3.12E-05 | 0.01      | 0.49      |
| 29 | <i>MAGEC1</i>   | +          | 2245             | 8                    | 16                      | 3                    | 0.06             | 0.13             | 0.56            | 4.29E-05 | 0.02      | 0.67      |

**Supplementary Table 5: Significantly mutated genes in sun-exposed melanomas**

|    | Gene Symbol    | Expression | Effective Length | Mutated Sample Count | Nonsynonymous SNV Count | Synonymous SNV Count | SNV LOH Fraction | Mean Gene PhyloP | Mean SNV PhyloP | Pvalue   | BH Pvalue | BF Pvalue |
|----|----------------|------------|------------------|----------------------|-------------------------|----------------------|------------------|------------------|-----------------|----------|-----------|-----------|
| 30 | <i>GJB2</i>    | -          | 505              | 4                    | 4                       | 0                    | 0.00             | 2.82             | 4.02            | 4.57E-05 | 0.02      | 0.72      |
| 31 | <i>CDH9</i>    | -          | 2125             | 11                   | 14                      | 3                    | 0.21             | 2.46             | 4.15            | 4.58E-05 | 0.02      | 0.72      |
| 32 | <i>ARMC4</i>   | -          | 3050             | 13                   | 17                      | 5                    | 0.06             | 1.92             | 2.39            | 5.76E-05 | 0.02      | 0.9       |
| 33 | <i>USH1C</i>   | -          | 2545             | 10                   | 14                      | 1                    | 0.07             | 2.24             | 2.32            | 5.95E-05 | 0.02      | 0.94      |
| 34 | <i>FAM49A</i>  | -          | 972              | 7                    | 9                       | 1                    | 0.00             | 3.32             | 4.48            | 6.45E-05 | 0.02      | 1         |
| 35 | <i>FSTL5</i>   | -          | 2367             | 9                    | 13                      | 2                    | 0.15             | 2.50             | 3.47            | 7.39E-05 | 0.02      | 1         |
| 36 | <i>JAKMIP2</i> | +          | 2356             | 12                   | 14                      | 4                    | 0.14             | 3.19             | 4.80            | 9E-05    | 0.03      | 1         |
| 37 | <i>EYA2</i>    | -          | 1615             | 8                    | 11                      | 2                    | 0.18             | 2.76             | 3.34            | 1.49E-04 | 0.04      | 1         |
| 38 | <i>ZNF385D</i> | -          | 1125             | 9                    | 10                      | 1                    | 0.00             | 2.92             | 3.12            | 1.79E-04 | 0.05      | 1         |

**b) No Expression Model (top 50 genes)**

| Rank | Gene Symbol     | Expression | Effective Length | Mutated Sample Count | Nonsynonymous SNV Count | Synonymous SNV Count | SNV LOH Fraction | Mean Gene PhyloP | Mean SNV PhyloP | Pvalue   | BH Pvalue | BF Pvalue |
|------|-----------------|------------|------------------|----------------------|-------------------------|----------------------|------------------|------------------|-----------------|----------|-----------|-----------|
| 1    | <i>BRAF</i>     | +          | 2290             | 28                   | 36                      | 0                    | 0.25             | 3.43             | 5.46            | 5.03E-51 | 3.95E-47  | 7.91E-47  |
| 2    | <i>NRAS</i>     | +          | 565              | 13                   | 13                      | 0                    | 0.54             | 3.63             | 4.96            | 4.99E-21 | 2.61E-17  | 7.84E-17  |
| 3    | <i>FAM5C</i>    | -          | 1886             | 14                   | 19                      | 2                    | 0.16             | 2.84             | 4.39            | 9.94E-14 | 3.12E-10  | 1.56E-09  |
| 4    | <i>ADAM7</i>    | -          | 2213             | 14                   | 20                      | 2                    | 0.20             | 0.95             | 1.30            | 5.11E-13 | 1.34E-09  | 8.04E-09  |
| 5    | <i>DSG4</i>     | -          | 2816             | 13                   | 22                      | 3                    | 0.14             | 1.50             | 1.98            | 4.28E-11 | 9.61E-08  | 6.73E-07  |
| 6    | <i>CD163L1</i>  | +          | 3877             | 15                   | 24                      | 2                    | 0.04             | 0.56             | 0.79            | 8.24E-11 | 1.55E-07  | 1.29E-06  |
| 7    | <i>TNR</i>      | -          | 3753             | 13                   | 22                      | 6                    | 0.14             | 2.62             | 3.24            | 9.78E-11 | 1.55E-07  | 1.54E-06  |
| 8    | <i>SI</i>       | -          | 5435             | 16                   | 30                      | 5                    | 0.17             | 1.72             | 2.57            | 2.31E-10 | 3.3E-07   | 3.63E-06  |
| 9    | <i>C6</i>       | -          | 2726             | 15                   | 18                      | 3                    | 0.06             | 1.57             | 1.42            | 6.99E-10 | 8.03E-07  | 1.1E-05   |
| 10   | <i>FAM83B</i>   | -          | 2172             | 12                   | 18                      | 2                    | 0.17             | 1.78             | 2.71            | 7.16E-10 | 8.03E-07  | 1.12E-05  |
| 11   | <i>GRM3</i>     | +          | 2124             | 12                   | 15                      | 2                    | 0.27             | 3.11             | 3.72            | 1.03E-09 | 1.08E-06  | 1.62E-05  |
| 12   | <i>CD163</i>    | -          | 3000             | 13                   | 21                      | 6                    | 0.10             | 1.27             | 1.32            | 5.32E-09 | 5.22E-06  | 8.36E-05  |
| 13   | <i>C15orf2</i>  | +          | 2248             | 13                   | 17                      | 4                    | 0.12             | -0.29            | -0.16           | 1.51E-08 | 1.39E-05  | 2.37E-04  |
| 14   | <i>GRIN3A</i>   | -          | 2727             | 9                    | 15                      | 3                    | 0.00             | 2.70             | 4.16            | 1.85E-08 | 1.62E-05  | 2.91E-04  |
| 15   | <i>C1orf168</i> | -          | 1914             | 12                   | 14                      | 4                    | 0.14             | 0.61             | 0.60            | 6.56E-08 | 5.33E-05  | 1.03E-03  |
| 16   | <i>SLC15A2</i>  | +          | 2186             | 11                   | 14                      | 1                    | 0.07             | 2.02             | 3.52            | 6.79E-08 | 5.33E-05  | 1.07E-03  |
| 17   | <i>CASR</i>     | -          | 2487             | 10                   | 14                      | 5                    | 0.07             | 2.69             | 2.82            | 7.31E-08 | 5.47E-05  | 1.15E-03  |
| 18   | <i>MAGEC1</i>   | +          | 2245             | 8                    | 16                      | 3                    | 0.06             | 0.13             | 0.56            | 7.66E-08 | 5.47E-05  | 1.2E-03   |

**Supplementary Table 5: Significantly mutated genes in sun-exposed melanomas**

| Rank | Gene Symbol     | Expression | Effective Length | Mutated Sample Count | Nonsynonymous SNV Count | Synonymous SNV Count | SNV LOH Fraction | Mean Gene PhyloP | Mean SNV PhyloP | Pvalue   | BH Pvalue | BF Pvalue |
|------|-----------------|------------|------------------|----------------------|-------------------------|----------------------|------------------|------------------|-----------------|----------|-----------|-----------|
| 19   | <i>CADM2</i>    | -          | 1243             | 9                    | 12                      | 1                    | 0.00             | 2.95             | 3.59            | 8.23E-08 | 5.62E-05  | 1.29E-03  |
| 20   | <i>ARMC4</i>    | -          | 3050             | 13                   | 17                      | 5                    | 0.06             | 1.92             | 2.39            | 1.01E-07 | 6.16E-05  | 1.59E-03  |
| 21   | <i>TPTE</i>     | -          | 1512             | 12                   | 12                      | 2                    | 0.08             | 0.59             | 1.06            | 1.01E-07 | 6.16E-05  | 1.59E-03  |
| 22   | <i>MYOCD</i>    | -          | 2351             | 11                   | 15                      | 3                    | 0.33             | 1.88             | 2.69            | 1.09E-07 | 6.32E-05  | 1.71E-03  |
| 23   | <i>USH1C</i>    | -          | 2545             | 10                   | 14                      | 1                    | 0.07             | 2.24             | 2.32            | 2.16E-07 | 1.13E-04  | 3.4E-03   |
| 24   | <i>JAKMIP2</i>  | +          | 2356             | 12                   | 14                      | 4                    | 0.14             | 3.19             | 4.80            | 3.44E-07 | 1.75E-04  | 5.41E-03  |
| 25   | <i>CDH9</i>     | -          | 2125             | 11                   | 14                      | 3                    | 0.21             | 2.46             | 4.15            | 3.9E-07  | 1.9E-04   | 6.13E-03  |
| 26   | <i>OR4K15</i>   | -          | 741              | 7                    | 8                       | 0                    | 0.13             | 0.78             | 1.29            | 3.99E-07 | 1.9E-04   | 6.27E-03  |
| 27   | <i>COL4A5</i>   | +          | 4913             | 19                   | 35                      | 5                    | 0.23             | 2.37             | 3.25            | 4.58E-07 | 2.12E-04  | 7.2E-03   |
| 28   | <i>WDR49</i>    | -          | 2031             | 9                    | 12                      | 1                    | 0.17             | 1.22             | 1.98            | 6.01E-07 | 2.7E-04   | 9.44E-03  |
| 29   | <i>TP53</i>     | +          | 1112             | 9                    | 9                       | 0                    | 0.56             | 1.27             | 2.63            | 6.28E-07 | 2.74E-04  | 9.87E-03  |
| 30   | <i>COL14A1</i>  | +          | 5307             | 15                   | 24                      | 5                    | 0.13             | 2.27             | 3.18            | 1.11E-06 | 4.58E-04  | 0.02      |
| 31   | <i>CAPZA3</i>   | -          | 606              | 8                    | 8                       | 1                    | 0.25             | 1.19             | 2.43            | 1.17E-06 | 4.71E-04  | 0.02      |
| 32   | <i>DNAH3</i>    | +          | 11243            | 18                   | 25                      | 11                   | 0.04             | 2.30             | 2.92            | 1.23E-06 | 4.82E-04  | 0.02      |
| 33   | <i>FSTL5</i>    | -          | 2367             | 9                    | 13                      | 2                    | 0.15             | 2.50             | 3.47            | 1.41E-06 | 5.39E-04  | 0.02      |
| 34   | <i>FAM49A</i>   | -          | 972              | 7                    | 9                       | 1                    | 0.00             | 3.32             | 4.48            | 2.41E-06 | 9.01E-04  | 0.04      |
| 35   | <i>PPP6C</i>    | +          | 928              | 8                    | 9                       | 0                    | 0.33             | 3.06             | 4.10            | 2.58E-06 | 9.42E-04  | 0.04      |
| 36   | <i>EYA2</i>     | -          | 1615             | 8                    | 11                      | 2                    | 0.18             | 2.76             | 3.34            | 2.98E-06 | 1.02E-03  | 0.05      |
| 37   | <i>TBX15</i>    | -          | 1243             | 9                    | 11                      | 3                    | 0.09             | 3.30             | 3.90            | 3.49E-06 | 1.17E-03  | 0.05      |
| 38   | <i>ZNF385D</i>  | -          | 1125             | 9                    | 10                      | 1                    | 0.00             | 2.92             | 3.12            | 3.9E-06  | 1.26E-03  | 0.06      |
| 39   | <i>TGM3</i>     | -          | 2045             | 11                   | 12                      | 3                    | 0.17             | 1.29             | 1.88            | 4.96E-06 | 1.56E-03  | 0.08      |
| 40   | <i>C9</i>       | -          | 1563             | 8                    | 11                      | 1                    | 0.09             | 0.84             | 0.61            | 5.92E-06 | 1.82E-03  | 0.09      |
| 41   | <i>PCDH15</i>   | +          | 5159             | 12                   | 20                      | 4                    | 0.00             | 2.09             | 2.48            | 6.95E-06 | 2.06E-03  | 0.11      |
| 42   | <i>ENPEP</i>    | -          | 2734             | 11                   | 14                      | 4                    | 0.07             | 1.83             | 1.94            | 7.3E-06  | 2.09E-03  | 0.11      |
| 43   | <i>CYP2C18</i>  | -          | 1451             | 8                    | 10                      | 2                    | 0.30             | 1.00             | 0.67            | 7.93E-06 | 2.22E-03  | 0.12      |
| 44   | <i>KCNH7</i>    | +          | 3443             | 12                   | 15                      | 3                    | 0.00             | 3.02             | 2.92            | 8.06E-06 | 2.22E-03  | 0.13      |
| 45   | <i>MECOM</i>    | +          | 2568             | 11                   | 14                      | 1                    | 0.07             | 2.90             | 4.16            | 1.08E-05 | 2.74E-03  | 0.17      |
| 46   | <i>KIAA2022</i> | +          | 2769             | 12                   | 13                      | 3                    | 0.15             | 2.00             | 3.02            | 2.72E-05 | 5.77E-03  | 0.43      |
| 47   | <i>SIGLEC12</i> | -          | 1570             | 8                    | 10                      | 4                    | 0.00             | -0.01            | 0.03            | 2.75E-05 | 5.77E-03  | 0.43      |
| 48   | <i>PTPRK</i>    | +          | 4118             | 12                   | 17                      | 1                    | 0.18             | 3.25             | 4.95            | 3.24E-05 | 6.37E-03  | 0.51      |
| 49   | <i>RBP3</i>     | -          | 2708             | 7                    | 10                      | 3                    | 0.00             | 1.79             | 2.58            | 3.48E-05 | 6.76E-03  | 0.55      |

## Supplementary Table 5: Significantly mutated genes in sun-exposed melanomas

| Rank | Gene Symbol   | Expression | Effective Length | Mutated Sample Count | Nonsynonymous SNV Count | Synonymous SNV Count | SNV LOH Fraction | Mean Gene PhyloP | Mean SNV PhyloP | Pvalue   | BH Pvalue | BF Pvalue |
|------|---------------|------------|------------------|----------------------|-------------------------|----------------------|------------------|------------------|-----------------|----------|-----------|-----------|
| 50   | <i>IFNA16</i> | -          | 290              | 3                    | 5                       | 0                    | 0.00             | -0.03            | 0.31            | 3.71E-05 | 6.85E-03  | 0.58      |

### c) Simple Model (top 50 genes)

| Rank | Gene Symbol     | Expression | Effective Length | Mutated Sample Count | Nonsynonymous SNV Count | Synonymous SNV Count | SNV LOH Fraction | Mean Gene PhyloP | Mean SNV PhyloP | Pvalue   | BH Pvalue | BF Pvalue |
|------|-----------------|------------|------------------|----------------------|-------------------------|----------------------|------------------|------------------|-----------------|----------|-----------|-----------|
| 1    | <i>BRAF</i>     | +          | 2290             | 28                   | 36                      | 0                    | 0.25             | 3.43             | 5.46            | 1.34E-57 | 7.01E-54  | 2.1E-53   |
| 2    | <i>DCC</i>      | +          | 4171             | 21                   | 35                      | 6                    | 0.09             | 2.80             | 4.25            | 3.36E-44 | 1.06E-40  | 5.28E-40  |
| 3    | <i>COL4A5</i>   | +          | 4913             | 19                   | 35                      | 5                    | 0.23             | 2.37             | 3.25            | 1.55E-38 | 4.06E-35  | 2.43E-34  |
| 4    | <i>SI</i>       | -          | 5435             | 16                   | 30                      | 5                    | 0.17             | 1.72             | 2.57            | 4.7E-35  | 1.05E-31  | 7.38E-31  |
| 5    | <i>ANK3</i>     | -          | 10038            | 20                   | 37                      | 24                   | 0.00             | 2.90             | 3.29            | 5.9E-34  | 1.16E-30  | 9.27E-30  |
| 6    | <i>COL3A1</i>   | +          | 4194             | 17                   | 31                      | 3                    | 0.06             | 2.56             | 3.98            | 9.33E-33 | 1.63E-29  | 1.47E-28  |
| 7    | <i>SCN10A</i>   | -          | 5528             | 15                   | 30                      | 13                   | 0.07             | 2.03             | 2.61            | 3.47E-32 | 5.45E-29  | 5.45E-28  |
| 8    | <i>PTPRD</i>    | +          | 5305             | 17                   | 27                      | 10                   | 0.19             | 3.51             | 4.39            | 8.62E-29 | 1.04E-25  | 1.36E-24  |
| 9    | <i>RP1</i>      | -          | 4311             | 12                   | 24                      | 7                    | 0.04             | 0.94             | 1.49            | 6.91E-28 | 7.24E-25  | 1.09E-23  |
| 10   | <i>ADAM7</i>    | -          | 2213             | 14                   | 20                      | 2                    | 0.20             | 0.95             | 1.30            | 1.11E-27 | 1.09E-24  | 1.75E-23  |
| 11   | <i>DSG4</i>     | -          | 2816             | 13                   | 22                      | 3                    | 0.14             | 1.50             | 1.98            | 1.47E-27 | 1.36E-24  | 2.31E-23  |
| 12   | <i>SPHKAP</i>   | -          | 3683             | 15                   | 24                      | 8                    | 0.08             | 1.38             | 1.79            | 1.96E-27 | 1.62E-24  | 3.08E-23  |
| 13   | <i>RELN</i>     | -          | 9997             | 16                   | 32                      | 13                   | 0.06             | 3.00             | 3.29            | 2.7E-27  | 2.02E-24  | 4.25E-23  |
| 14   | <i>FAM5C</i>    | -          | 1886             | 14                   | 19                      | 2                    | 0.16             | 2.84             | 4.39            | 7.72E-27 | 5.51E-24  | 1.21E-22  |
| 15   | <i>ADAMTS20</i> | +          | 5489             | 15                   | 25                      | 5                    | 0.16             | 2.00             | 3.23            | 3.38E-26 | 2.31E-23  | 5.31E-22  |
| 16   | <i>COL5A1</i>   | +          | 5440             | 15                   | 29                      | 10                   | 0.03             | 2.55             | 2.89            | 7.66E-26 | 5.02E-23  | 1.2E-21   |
| 17   | <i>CD163L1</i>  | +          | 3877             | 15                   | 24                      | 2                    | 0.04             | 0.56             | 0.79            | 1.56E-25 | 9.8E-23   | 2.45E-21  |
| 18   | <i>CSMD2</i>    | +          | 10321            | 17                   | 32                      | 21                   | 0.06             | 2.86             | 3.63            | 2.92E-25 | 1.76E-22  | 4.59E-21  |
| 19   | <i>XDH</i>      | -          | 3943             | 14                   | 23                      | 10                   | 0.04             | 2.41             | 3.23            | 1.32E-24 | 7.7E-22   | 2.08E-20  |
| 20   | <i>MUC17</i>    | +          | 8441             | 16                   | 25                      | 3                    | 0.12             | -0.16            | -0.42           | 2.39E-24 | 1.34E-21  | 3.76E-20  |
| 21   | <i>FAM83B</i>   | -          | 2172             | 12                   | 18                      | 2                    | 0.17             | 1.78             | 2.71            | 2.52E-24 | 1.37E-21  | 3.96E-20  |
| 22   | <i>ADAMTS18</i> | -          | 3586             | 11                   | 21                      | 10                   | 0.10             | 2.38             | 2.88            | 1.12E-23 | 5.88E-21  | 1.76E-19  |
| 23   | <i>CD163</i>    | -          | 3000             | 13                   | 21                      | 6                    | 0.10             | 1.27             | 1.32            | 1.77E-23 | 9E-21     | 2.79E-19  |
| 24   | <i>COL14A1</i>  | +          | 5307             | 15                   | 24                      | 5                    | 0.13             | 2.27             | 3.18            | 2.28E-23 | 1.12E-20  | 3.59E-19  |
| 25   | <i>COL11A1</i>  | -          | 5557             | 15                   | 26                      | 6                    | 0.08             | 3.12             | 4.28            | 2.65E-23 | 1.26E-20  | 4.17E-19  |

**Supplementary Table 5: Significantly mutated genes in sun-exposed melanomas**

| Rank | Gene Symbol     | Expression | Effective Length | Mutated Sample Count | Nonsynonymous SNV Count | Synonymous SNV Count | SNV LOH Fraction | Mean Gene PhyloP | Mean SNV PhyloP | Pvalue   | BH Pvalue | BF Pvalue |
|------|-----------------|------------|------------------|----------------------|-------------------------|----------------------|------------------|------------------|-----------------|----------|-----------|-----------|
| 26   | <i>C15orf2</i>  | +          | 2248             | 13                   | 17                      | 4                    | 0.12             | -0.29            | -0.16           | 3.14E-23 | 1.45E-20  | 4.94E-19  |
| 27   | <i>TNR</i>      | -          | 3753             | 13                   | 22                      | 6                    | 0.14             | 2.62             | 3.24            | 3.82E-23 | 1.71E-20  | 6E-19     |
| 28   | <i>ADAMDEC</i>  | -          | 1412             | 11                   | 15                      | 11                   | 0.07             | 0.86             | 1.15            | 2.56E-22 | 1.12E-19  | 4.02E-18  |
| 29   | <i>NRAS</i>     | +          | 565              | 13                   | 13                      | 0                    | 0.54             | 3.63             | 4.96            | 4.32E-22 | 1.84E-19  | 6.79E-18  |
| 30   | <i>C6</i>       | -          | 2726             | 15                   | 18                      | 3                    | 0.06             | 1.57             | 1.42            | 8.19E-22 | 3.39E-19  | 1.29E-17  |
| 31   | <i>USH2A</i>    | +          | 14158            | 17                   | 29                      | 14                   | 0.14             | 1.62             | 1.77            | 8E-21    | 3.14E-18  | 1.26E-16  |
| 32   | <i>SLCO1B3</i>  | +          | 2001             | 13                   | 15                      | 5                    | 0.07             | 0.90             | 0.82            | 1.07E-20 | 4.12E-18  | 1.69E-16  |
| 33   | <i>MAGEC1</i>   | +          | 2245             | 8                    | 16                      | 3                    | 0.06             | 0.13             | 0.56            | 1.58E-20 | 5.91E-18  | 2.48E-16  |
| 34   | <i>PCDH15</i>   | +          | 5159             | 12                   | 20                      | 4                    | 0.00             | 2.09             | 2.48            | 4.25E-20 | 1.52E-17  | 6.68E-16  |
| 35   | <i>FAT4</i>     | +          | 6880             | 13                   | 22                      | 6                    | 0.09             | 2.41             | 3.64            | 9.39E-20 | 3.28E-17  | 1.48E-15  |
| 36   | <i>GRID2</i>    | +          | 2837             | 13                   | 17                      | 6                    | 0.12             | 3.20             | 3.35            | 2.45E-19 | 8.19E-17  | 3.85E-15  |
| 37   | <i>ARMC4</i>    | -          | 3050             | 13                   | 17                      | 5                    | 0.06             | 1.92             | 2.39            | 2.85E-19 | 9.33E-17  | 4.48E-15  |
| 38   | <i>APOB</i>     | -          | 10020            | 16                   | 24                      | 12                   | 0.08             | 1.21             | 1.27            | 3.53E-19 | 1.13E-16  | 5.55E-15  |
| 39   | <i>SPATA18</i>  | +          | 1541             | 10                   | 14                      | 3                    | 0.00             | 1.28             | 2.59            | 3.82E-19 | 1.2E-16   | 6E-15     |
| 40   | <i>GRM3</i>     | +          | 2124             | 12                   | 15                      | 2                    | 0.27             | 3.11             | 3.72            | 6.67E-19 | 2.02E-16  | 1.05E-14  |
| 41   | <i>C1orf168</i> | -          | 1914             | 12                   | 14                      | 4                    | 0.14             | 0.61             | 0.60            | 4.07E-18 | 1.12E-15  | 6.39E-14  |
| 42   | <i>CDH6</i>     | -          | 2154             | 12                   | 15                      | 7                    | 0.13             | 2.78             | 3.05            | 4.62E-18 | 1.23E-15  | 7.25E-14  |
| 43   | <i>RFX6</i>     | -          | 2639             | 10                   | 15                      | 4                    | 0.07             | 2.54             | 2.64            | 4.78E-18 | 1.25E-15  | 7.51E-14  |
| 44   | <i>CDH9</i>     | -          | 2125             | 11                   | 14                      | 3                    | 0.21             | 2.46             | 4.15            | 5.69E-18 | 1.47E-15  | 8.95E-14  |
| 45   | <i>C1orf173</i> | -          | 3550             | 15                   | 18                      | 11                   | 0.17             | 0.71             | 0.71            | 9.42E-18 | 2.35E-15  | 1.48E-13  |
| 46   | <i>GRIN3A</i>   | -          | 2727             | 9                    | 15                      | 3                    | 0.00             | 2.70             | 4.16            | 1.35E-17 | 3.31E-15  | 2.12E-13  |
| 47   | <i>DNAH3</i>    | +          | 11243            | 18                   | 25                      | 11                   | 0.04             | 2.30             | 2.92            | 1.94E-17 | 4.69E-15  | 3.05E-13  |
| 48   | <i>TPTE</i>     | -          | 1512             | 12                   | 12                      | 2                    | 0.08             | 0.59             | 1.06            | 2.6E-17  | 5.92E-15  | 4.09E-13  |
| 49   | <i>SLC15A2</i>  | +          | 2186             | 11                   | 14                      | 1                    | 0.07             | 2.02             | 3.52            | 2.72E-17 | 6.1E-15   | 4.27E-13  |
| 50   | <i>PTPRK</i>    | +          | 4118             | 12                   | 17                      | 1                    | 0.18             | 3.25             | 4.95            | 2.93E-17 | 6.5E-15   | 4.61E-13  |



## Supplementary Table 6: Somatic mutations in genes coding MAPKs

| Gene Symbol | Accession      | Chr   | Position  | Reference Genotype | Variant Genotype | Amino Acid Change | Total | Expression | COSMIC | PhyloP Cons. Score | p-fam domain |
|-------------|----------------|-------|-----------|--------------------|------------------|-------------------|-------|------------|--------|--------------------|--------------|
| MAP2K1      | NM_002755.3    | chr15 | 66729162  | C/C                | C/T              | P124S             | 2     | +          | N      | 5.92               | Pkinase      |
| MAP2K3      | NM_145109.2    | chr17 | 21202225  | C/C                | C/T              | T51I              | 1     | +          | N      | 4.58               |              |
| MAP2K3      | NM_145109.2    | chr17 | 21201778  | G/G                | G/A              | A35T              | 1     | +          | N      | 1.34               |              |
| MAP2K3      | NM_145109.2    | chr17 | 21201737  | G/G                | G/T              | R21M              | 1     | +          | N      | 0.13               |              |
| MAP2K3      | NM_145109.2    | chr17 | 21206510  | G/G                | G/A              | E178K             | 1     | +          | N      | 6.06               | Pkinase      |
| MAP2K4      | NM_003010.2    | chr17 | 12016578  | C/C                | C/A              | D238E             | 1     | +          | N      | -0.02              | Pkinase      |
| MAP2K4      | NM_003010.2    | chr17 | 11958245  | C/C                | C/T              | P52L              | 1     | +          | N      | 5.01               |              |
| MAP2K5      | NM_145160.2    | chr15 | 68020260  | C/C                | C/T              | L351F             | 1     | +          | N      | 4.41               | Pkinase      |
| MAP2K6      | NM_002758.3    | chr17 | 67517227  | C/C                | C/T              | S174F             | 1     | +          | N      | 4.13               | Pkinase      |
| MAP3K10     | NM_002446.3    | chr19 | 40710502  | C/C                | C/T              | P325L             | 1     | +          | N      | 3.80               | Pkinase      |
| MAP3K11     | NM_002419.3    | chr11 | 65375153  | C/C                | C/G              | E402Q             | 1     | +          | N      | 5.41               |              |
| MAP3K11     | NM_002419.3    | chr11 | 65373447  | G/G                | G/A              | S570F             | 1     | +          | N      | 4.03               |              |
| MAP3K12     | NM_001193511.1 | chr12 | 53880776  | T/T                | T/C              | M134V             | 1     | +          | N      | 4.50               |              |
| MAP3K12     | NM_001193511.1 | chr12 | 53880918  | C/C                | C/A              | Q86H              | 1     | +          | N      | 0.69               |              |
| MAP3K12     | NM_001193511.1 | chr12 | 53878135  | C/C                | C/T              | R385Q             | 1     | +          | N      | 5.79               | Pkinase      |
| MAP3K13     | NM_004721.3    | chr3  | 185155318 | T/T                | T/C              | F187L             | 1     | +          | N      | 5.06               | Pkinase      |
| MAP3K13     | NM_004721.3    | chr3  | 185183626 | G/G                | G/A              | E494K             | 1     | +          | N      | 4.16               |              |
| MAP3K13     | NM_004721.3    | chr3  | 185167771 | T/T                | T/C              | V365A             | 1     | +          | N      | 5.11               | Pkinase      |
| MAP3K15     | NM_001001671.3 | chrX  | 19428074  | C/C                | C/T              | W572X             | 1     | +          | N      | 3.88               |              |
| MAP3K15     | NM_001001671.3 | chrX  | 19389588  | C/C                | C/T              | D1057N            | 1     | +          | N      | 3.87               |              |
| MAP3K15     | NM_001001671.3 | chrX  | 19392708  | G/G                | G/A              | S887F             | 1     | +          | N      | 1.24               | Pkinase      |
| MAP3K15     | NM_001001671.3 | chrX  | 19379650  | C/C                | C/T              | W1247X            | 1     | +          | N      | 4.93               |              |
| MAP3K4      | NM_005922.2    | chr6  | 161514074 | G/G                | G/A              | E1112K            | 1     | +          | N      | 6.26               |              |
| MAP3K4      | NM_005922.2    | chr6  | 161455358 | G/G                | G/T              | E74X              | 1     | +          | N      | 4.33               |              |
| MAP3K5      | NM_005923.3    | chr6  | 136901529 | G/G                | G/A              | R1143W            | 1     | +          | N      | 2.09               |              |
| MAP3K5      | NM_005923.3    | chr6  | 136958516 | C/C                | C/T              | E655K             | 1     | +          | N      | 5.25               |              |
| MAP3K5      | NM_005923.3    | chr6  | 137019697 | G/G                | A/A              | L246F             | 1     | +          | N      | 4.10               |              |
| MAP3K5      | NM_005923.3    | chr6  | 136980475 | C/C                | C/T              | E470K             | 1     | +          | N      | 5.92               |              |
| MAP3K5      | NM_005923.3    | chr6  | 136972229 | C/C                | C/T              | V561I             | 1     | +          | N      | 5.04               |              |
| MAP3K6      | NM_004672.3    | chr1  | 27682167  | G/G                | G/A              | R1261C            | 1     | +          | N      | 0.08               |              |
| MAP3K8      | NM_005204.2    | chr10 | 30736798  | G.T/G.T            | G.T/T.A          | D142X             | 1     | -          | N      | 2.19               | Pkinase      |

**Supplementary Table 6: Somatic mutations in genes coding MAPKs**

| Gene Symbol   | Accession   | Chr   | Position  | Reference Genotype | Variant Genotype | Amino Acid Change | Total | Expression | COSMIC | Phylop Cons. Score | p-fam domain |
|---------------|-------------|-------|-----------|--------------------|------------------|-------------------|-------|------------|--------|--------------------|--------------|
| <i>MAP3K8</i> | NM_005204.2 | chr10 | 30749739  | G/G                | G/A              | G460R             | 1     | -          | N      | 3.84               |              |
| <i>MAP3K9</i> | NM_033141.2 | chr14 | 71199675  | G/G                | G/A              | P818L             | 1     | -          | N      | 1.45               |              |
| <i>MAP3K9</i> | NM_033141.2 | chr14 | 71205034  | G/G                | G/A              | A591V             | 1     | -          | N      | 2.71               |              |
| <i>MAP3K9</i> | NM_033141.2 | chr14 | 71209269  | G/G                | G/C              | L456V             | 1     | -          | N      | 1.78               |              |
| <i>MAP3K9</i> | NM_033141.2 | chr14 | 71227765  | C/C                | C/T              | E319K             | 1     | -          | N      | 5.94               | Pkinase      |
| <i>MAP3K9</i> | NM_033141.2 | chr14 | 71197422  | G/G                | G/A              | P1011L            | 1     | -          | N      | 5.81               |              |
| <i>MAP4K2</i> | NM_004579.3 | chr11 | 64564613  | G/G                | G/A              | T443M             | 1     | +          | N      | 1.11               |              |
| <i>MAP4K3</i> | NM_003618.2 | chr2  | 39479010  | G/G                | G/A              | S853L             | 1     | +          | N      | 3.85               | CNH          |
| <i>MAP4K3</i> | NM_003618.2 | chr2  | 39535101  | T/T                | T/G              | T368P             | 1     | +          | N      | 2.57               |              |
| <i>MAP4K3</i> | NM_003618.2 | chr2  | 39505579  | A/A                | A/G              | L588P             | 1     | +          | N      | 4.64               | CNH          |
| <i>MAP4K3</i> | NM_003618.2 | chr2  | 39559079  | G/G                | G/A              | S170F             | 1     | +          | N      | 6.10               | Pkinase      |
| <i>MAPK1</i>  | NM_138957.2 | chr22 | 22127166  | T/T                | T/A              | D321V             | 1     | +          | N      | 4.91               |              |
| <i>MAPK1</i>  | NM_138957.2 | chr22 | 22142605  | G/G                | G/A              | S266F             | 1     | +          | N      | 6.35               | Pkinase      |
| <i>MAPK1</i>  | NM_138957.2 | chr22 | 22142599  | G/G                | G/A              | P268L             | 1     | +          | N      | 6.35               | Pkinase      |
| <i>MAPK10</i> | NM_138982.2 | chr4  | 87019707  | G/G                | G/A              | R258C             | 1     | +          | N      | 6.30               | Pkinase      |
| <i>MAPK10</i> | NM_138982.2 | chr4  | 86989058  | C/C                | C/T              | E285K             | 1     | +          | N      | 6.06               | Pkinase      |
| <i>MAPK13</i> | NM_002754.3 | chr6  | 36106731  | C/C                | C/T              | P306L             | 1     | +          | N      | 2.98               | Pkinase      |
| <i>MAPK14</i> | NM_139012.2 | chr6  | 36040751  | G/G                | G/A              | R136Q             | 1     | +          | N      | 6.31               | Pkinase      |
| <i>MAPK14</i> | NM_139012.2 | chr6  | 36063799  | G/G                | G/A              | G240R             | 1     | +          | N      | 5.50               | Pkinase      |
| <i>MAPK6</i>  | NM_002748.3 | chr15 | 52356254  | A/A                | A/G              | K408R             | 1     | +          | N      | 4.58               |              |
| <i>MAPK6</i>  | NM_002748.3 | chr15 | 52353594  | CC/CC              | CC/TT            | P322L             | 1     | +          | N      | 5.85               |              |
| <i>MAPK6</i>  | NM_002748.3 | chr15 | 52350880  | G/G                | G/T              | V251L             | 1     | +          | N      | 3.07               | Pkinase      |
| <i>MAPK6</i>  | NM_002748.3 | chr15 | 52356250  | G/G                | G/T              | E407X             | 1     | +          | N      | 5.56               |              |
| <i>MAPK7</i>  | NM_139034.2 | chr17 | 19286249  | C/C                | C/T              | P763S             | 1     | +          | N      | 2.47               |              |
| <i>MAPK8</i>  | NM_139047.1 | chr10 | 49617959  | C/C                | C/T              | S97F              | 1     | +          | N      | 4.50               | Pkinase      |
| <i>MAPK9</i>  | NM_139070.2 | chr5  | 179688748 | G/G                | G/A              | S129F             | 1     | +          | N      | 5.96               | Pkinase      |

**Supplementary Table 7: Genes with significant numbers of deleterious mutations across all sun-exposed melanomas (n=97)**

| Gene Symbol     | Length (bp) | Number of melanomas with deleterious mutations |                    |                      | Pval     | BH Pval  | BF Pval  | Expression |
|-----------------|-------------|------------------------------------------------|--------------------|----------------------|----------|----------|----------|------------|
|                 |             | Nonsense Mutations                             | Frame Shift InDels | Splice Site Variants |          |          |          |            |
| <i>TP53</i>     | 1112        | 6                                              | 2                  | 2                    | 3.29E-15 | 5.17E-11 | 5.17E-11 | +          |
| <i>NF1</i>      | 7866        | 8                                              | 2                  | 2                    | 2.35E-12 | 1.23E-08 | 3.69E-08 | +          |
| <i>ARID2</i>    | 4426        | 6                                              | 5                  | 0                    | 6.73E-12 | 2.65E-08 | 1.06E-07 | +          |
| <i>DCC</i>      | 4171        | 9                                              | 0                  | 0                    | 1.98E-08 | 6.21E-05 | 3.11E-04 | +          |
| <i>ZNF560</i>   | 1759        | 5                                              | 0                  | 1                    | 3.36E-07 | 8.81E-04 | 5.28E-03 | +          |
| <i>FAM49A</i>   | 972         | 4                                              | 0                  | 1                    | 4.45E-07 | 9.98E-04 | 6.99E-03 | -          |
| <i>SLC22A25</i> | 1546        | 5                                              | 0                  | 0                    | 4.22E-06 | 8.22E-03 | 0.07     | -          |
| <i>FAM58A</i>   | 715         | 4                                              | 0                  | 0                    | 4.71E-06 | 8.22E-03 | 0.07     | +          |
| <i>ME1</i>      | 1695        | 3                                              | 0                  | 1                    | 6.56E-06 | 0.01     | 0.1      | +          |
| <i>TGM3</i>     | 2045        | 3                                              | 0                  | 2                    | 1.61E-05 | 0.02     | 0.25     | -          |

**Supplementary Table 8: Genes with multiple somatic mutations in sun-shielded melanomas**

| Gene Symbol    | Accession   | Acral Melanomas                                                                 | Mucosal Melanomas | Uveal Melanomas                                 |
|----------------|-------------|---------------------------------------------------------------------------------|-------------------|-------------------------------------------------|
| <i>ARFGEF2</i> | NM_006420.2 | YUIRI(P1649P)                                                                   | YUSAN(A751A)      |                                                 |
| <i>COL2A1</i>  | NM_001844.4 | YUISKIA(G1209S)                                                                 |                   | YUBOO(S1001L)                                   |
| <i>DYNC111</i> | NM_004411.4 | YUBOT(R629C)<br>YUWIC(R629C)<br>YUSAG(V506G)                                    |                   |                                                 |
| <i>GNA11</i>   | NM_002067.2 |                                                                                 |                   | YUCRENA(Q209L)<br>YUVEDO(Q209L)<br>YUBOO(R183C) |
| <i>GYS1</i>    | NM_002103.4 | YUMUDE(I524V)                                                                   |                   | YUBOO(R192C)                                    |
| <i>SZT2</i>    | NM_015284.2 | YUNUVO(D374N)                                                                   |                   | YUBOO(R1207Q)                                   |
| <i>KIT</i>     | NM_000222.2 | YURUB(N822Y)<br>YUBRUSE(L576P)<br>YUSAG(K642E)<br>YUSCH(L576P)<br>YUMUDE(V559D) |                   |                                                 |
| <i>SPAG17</i>  | NM_206996.2 | YUISKIA(A2T)                                                                    |                   | YUBOO(R830C)                                    |

\* YUVEDO has only 2 somatic mutations.

\*\* The R629C mutation was also identified in YUDUTY, a melanoma of unknown primary.

**Supplementary Table 9: Copy number gains and losses in melanomas**

| Chr   | Band | CNV Status | All Samples | Sun Exposed | Acral | Mucosal | Uveal | Unknown | Candidate genes with significant numbers of SCNA events |
|-------|------|------------|-------------|-------------|-------|---------|-------|---------|---------------------------------------------------------|
| chr1  | q31  | gain       | 11          | 7           | 0     | 2       | 0     | 2       | <i>ASPM-PTPRC</i>                                       |
| chr1  | q42  | gain       | 5           | 4           | 0     | 1       | 0     | 0       | <i>LYST</i>                                             |
| chr5  | p13  | gain       | 12          | 3           | 6     | 3       | 0     | 0       | <i>NADKD1-NIPBL-NUP155-PDZD2-RANBP3L-RICTOR</i>         |
| chr7  | q11  | gain       | 5           | 4           | 0     | 1       | 0     | 0       | <i>GTF2IRD2</i>                                         |
| chr7  | q34  | gain       | 8           | 5           | 1     | 1       | 0     | 1       | <i>ADCK2-BRAF</i>                                       |
| chr8  | q24  | gain       | 9           | 5           | 2     | 1       | 2     | 1       | <i>ASAP1-ATAD2-KIFC2-PTK2</i>                           |
| chr11 | q13  | gain       | 9           | 1           | 4     | 3       | 0     | 1       | <i>ACER3-CAPN5-CCND1-CTTN-SHANK2</i>                    |
| chr11 | q14  | gain       | 10          | 3           | 3     | 3       | 0     | 1       | <i>AQP11-INTS4-RSF1-TMEM135</i>                         |
| chr12 | q14  | gain       | 5           | 0           | 3     | 1       | 0     | 1       | <i>CDK4</i>                                             |
| chr20 | q13  | gain       | 10          | 5           | 2     | 1       | 1     | 2       | <i>PRIC285-SYCP2</i>                                    |
| chr5  | q31  | loss       | 4           | 4           | 0     | 0       | 0     | 0       | <i>PCDHB8</i>                                           |
| chr8  | p23  | loss       | 7           | 5           | 1     | 0       | 1     | 1       | <i>DEFA3-SPAG11B</i>                                    |
| chr9  | p13  | loss       | 4           | 3           | 0     | 0       | 0     | 1       | <i>ZNF658</i>                                           |
| chr9  | p21  | loss       | 27          | 17          | 3     | 2       | 0     | 5       | <i>CDKN2A-DMRTA1-ELAVL2-MTAP</i>                        |
| chr9  | p24  | loss       | 9           | 6           | 0     | 0       | 0     | 3       | <i>CBWD1</i>                                            |
| chr10 | p12  | loss       | 17          | 9           | 3     | 1       | 0     | 4       | <i>LYZL1-MRC1L1</i>                                     |
| chr10 | q11  | loss       | 19          | 11          | 3     | 1       | 0     | 4       | <i>AGAP4-ANXA8L2-FRMPD2-PTPN20B</i>                     |
| chr10 | q23  | loss       | 8           | 6           | 0     | 1       | 0     | 1       | <i>PTEN</i>                                             |
| chr10 | q26  | loss       | 4           | 1           | 3     | 0       | 0     | 0       | <i>TACC2</i>                                            |
| chr14 | q11  | loss       | 4           | 4           | 0     | 0       | 0     | 0       | <i>POTEG</i>                                            |
| chr14 | q24  | loss       | 7           | 5           | 1     | 0       | 0     | 1       | <i>ACOT1</i>                                            |
| chr17 | q11  | loss       | 7           | 2           | 2     | 1       | 1     | 2       | <i>ATAD5-LRRC37B</i>                                    |
| chr19 | q13  | loss       | 7           | 4           | 2     | 0       | 1     | 1       | <i>FCGBP-KIR2DL1-KIR2DL3-KIR3DL3</i>                    |

## Supplementary Table 10: Information on patients with the RAC1<sup>P29S</sup> mutation

Clinical and genetic information of melanomas with the RAC1<sup>P29S</sup> mutation

| Melanoma  | Gender/<br>Age | Breslow<br>thickness<br>(mm) | Primary<br>Location | Tumor<br>Analyzed | Final<br>Stage | <i>BRAF</i> | <i>NRAS</i> | <i>CDKN2A</i>       |
|-----------|----------------|------------------------------|---------------------|-------------------|----------------|-------------|-------------|---------------------|
| DF-T      | M/79           | Unknown                      | Shoulder            | M                 | IV             | V600E       | WT          | WT                  |
| YUBRO-T   | M/56           | 0.85                         | Forearm             | M                 | IV             | WT          | WT          | WT                  |
| YUCAV-T   | M/61           | 2.85                         | Forearm             | P                 | IIB            | WT          | Q61K        | WT                  |
| YUCOW-T   | M/69           | 1.5                          | Mid back            | P                 | IB             | V600E       | WT          | WT                  |
| YUFAR-T   | M/48           | 0.91                         | Chest               | P                 | IV             | V600E       | WT          | T79X/T <sup>U</sup> |
| YUFIC-C   | M/65           | 2.24                         | Leg                 | M                 | IV             | WT          | Q61R        | WT                  |
| YUGOV-T   | M/60           | 2.1                          | Scapula             | M                 | IV             | V600K       | WT          | WT                  |
| YUHEF-C   | M/52           | 1.7                          | Scalp               | M                 | IV             | WT          | WT          | A57X/A <sup>S</sup> |
| YUKAT-T   | M/78           | NA                           | Unknown             | M                 | IV             | WT          | WT          | WT                  |
| YUKLAB-T  | M/84           | NA                           | Unknown             | M                 | IV             | WT          | WT          | WT                  |
| YULAN-T   | M/81           | 7.5                          | Scalp               | M                 | IV             | WT          | WT          | WT                  |
| YUMCE-T   | M/81           | MIS                          | Upper arm           | M                 | IV             | WT          | WT          | WT                  |
| YUNACK-T  | F/59           | 22.0                         | Trunk               | P                 | I              | V600E       | WT          | WT                  |
| YUPROST-T | F/86           | 1.1                          | Neck                | P                 | IIB            | WT          | WT          | WT                  |
| YURIF-C   | M/52           | 3.0                          | Thigh               | M                 | IV             | V600K       | WT          | R62K/R <sup>S</sup> |
| YUSOC-C   | M/98           | 1.2                          | Cheek               | P                 | II             | WT          | WT          | T79X/T <sup>U</sup> |
| YUSUKA-T  | M/89           | 1.42                         | Ear                 | P                 | IB             | WT          | WT          | WT                  |
| YUTOGS-T1 | M/50           | 3.5                          | Scalp               | M                 | IV             | WT          | WT          | WT                  |
| YUVEME-T  | M/78           | 1.0                          | Cheek               | M                 | IV             | WT          | WT          | WT                  |
| YUWIA-T   | M/83           | 0.9                          | Calf                | M                 | IIIB           | WT          | Q61K        | WT                  |
| C021-C    | M/37           | UK                           | Shoulder            | M                 | UK             | WT          | WT          | NA                  |
| C083-C    | M/38           | UK                           | Unknown             | M                 | UK             | WT          | Q61L        | NA                  |
| D26-C     | M/55           | UK                           | Unknown             | M                 | UK             | WT          | WT          | NA                  |
| MM96L-C2  | F/67           | UK                           | Scapula             | M                 | UK             | V600E       | WT          | WT                  |

T and C designate snap-frozen tumors and cultured melanoma cells, respectively. P and M denotes primary and metastatic melanoma, respectively. MIS, Melanoma in situ; NA, not applicable; UK, unknown.

<sup>1</sup> The RAC1 mutation was identified in the primary and metastatic lesions of this patient.

<sup>2</sup> Homozygous for RAC1<sup>P29S</sup> due to copy neutral LOH spanning the locus.

<sup>S</sup> Somatic CDKN2A mutation.

<sup>U</sup> Unknown because germline DNA is not available.

**Supplementary Table 11: RAC1 crystal structure data collection and refinement statistics**

|                                                                                      | <b>RAC1<sup>P29S</sup></b><br><b>PDB ID: 3SBD</b>     | <b>RAC1<sup>P29S</sup></b><br><b>PDB ID: 3SBE</b> | <b>RAC1 wild-type</b><br><b>PDB ID: 3TH5</b> |
|--------------------------------------------------------------------------------------|-------------------------------------------------------|---------------------------------------------------|----------------------------------------------|
| <i>Data collection</i>                                                               |                                                       |                                                   |                                              |
| Space group                                                                          | <i>P</i> 2 <sub>1</sub> 2 <sub>1</sub> 2 <sub>1</sub> | <i>P</i> 2 <sub>2</sub> 2 <sub>1</sub>            | <i>P</i> 2 <sub>1</sub>                      |
| X-ray source and detector                                                            | RIGAKU 007 HF<br>Saturn 944+ CCD                      | RIGAKU 007 HF<br>Saturn 944+ CCD                  | APS NECAT-E<br>ADSC Q315                     |
| Wavelength (Å)                                                                       | 1.5418                                                | 1.5418                                            | 0.97921                                      |
| Cell: a, b, c (Å)                                                                    | 50.3, 80.0, 94.9                                      | 40.6, 51.9, 99.3                                  | 40.9, 97.9, 51.7                             |
| α, β, γ (°)                                                                          | 90, 90, 90                                            | 90, 90, 90                                        | 90, 96.6, 90                                 |
| Resolution range (Å)                                                                 | 20.0 - 2.1 (2.17 - 2.1)                               | 20.0 - 2.6 (2.7 - 2.6)                            | 30.0 - 2.3 (2.38 - 2.3)                      |
| No. of unique reflections                                                            | 23040                                                 | 6926                                              | 18169                                        |
| Completeness (%)                                                                     | 98.3 (86.4)                                           | 99.9 (100.0)                                      | 99.0 (99.3)                                  |
| <i>R</i> <sub>sym</sub> (%)                                                          | 12.9 (64.7)                                           | 11.2                                              | 5.2 (29.5)                                   |
| Mn //σI                                                                              | 10.1 (1.5)                                            | 13.0 (2.0)                                        | 23.1 (3.9)                                   |
| Redundancy                                                                           | 5.6 (2.4)                                             | 6.6 (6.7)                                         | 3.5 (3.4)                                    |
| <i>Refinement statistics</i>                                                         |                                                       |                                                   |                                              |
| Resolution range (Å)                                                                 | 19.7 - 2.1 (2.15 - 2.1)                               | 19.9 - 2.6 (2.7 - 2.6)                            | 20.0 - 2.3 (2.36 - 2.3)                      |
| <i>R</i> -factor (%)                                                                 |                                                       |                                                   |                                              |
| Working set                                                                          | 23.8 (29.1)                                           | 23.1 (30.2)                                       | 22.9 (33.3)                                  |
| Test set                                                                             | 28.5 (39.3)                                           | 29.6 (42.3)                                       | 26.4 (42.1)                                  |
| Free <i>R</i> reflections (%)                                                        | 5.2 (4.9)                                             | 4.7 (4.9)                                         | 5.1 (5.0)                                    |
| Free <i>R</i> reflections, no.                                                       | 1158 (63)                                             | 325 (23)                                          | 910 (63)                                     |
| Residues built                                                                       | A/1 - 177<br>B/2 - 177                                | 0 - 177                                           | A/2 - 177<br>B/2 - 29, 35 -177               |
| No. water molecules                                                                  | 146                                                   | 23                                                | 23                                           |
| Mean <i>B</i> -factor (Å <sup>2</sup> )<br>Protein / GMP-PNP / Mg / H <sub>2</sub> O | 30.7 / 25.7 / 24.5 / 30.8                             | 58.4 / 47.9 / 42.0 / 54.0                         | 60.7 / 49.9 / 50.7 / 58.1                    |
| <i>Model statistics</i>                                                              |                                                       |                                                   |                                              |
| RMSD bond lengths (Å)                                                                | 0.014                                                 | 0.014                                             | 0.007                                        |
| RMSD bond angles (°)                                                                 | 1.576                                                 | 1.521                                             | 1.106                                        |
| Ramachandran plot (%) favored/<br>allowed/disallowed                                 | 97.1 / 2.9 / 0                                        | 94.9 / 5.1 / 0                                    | 97.1 / 2.9 / 0                               |

**Supplementary Table 12: Primers and oligos used in the studies**

| Gene                                 | Backward primer                                                                                                                                      |
|--------------------------------------|------------------------------------------------------------------------------------------------------------------------------------------------------|
| <i>RAC1</i> P29S <sup>1</sup>        | F1: 5'- ACCTAAACAGAATGTGATGGCTCC -3'<br>R1: 5'- GGTCAAAGAAATGTGAAACCCG -3'<br>F2: 5'-TGGTGATAAAGGGTTATAGAAAACA-3'<br>R2: 5'- CAGCAAAACAAATGGTCAAA-3' |
| <i>RAC1</i> Q220X/R301C <sup>2</sup> | F: 5'- TGCTAATGCCTGGAGATACTGTACC -3<br>R: 5'- TCGTTCTGGGAGGAATAACACG -3'                                                                             |
| <i>RAC1</i> -P29S <sup>3</sup>       | F:GTTACACAACCAATGCATTTTCTGGAGAATATATCCCTACTG 3'<br>R:5' CAGTAGGGATATATTCTCCAGAAAATGCATTGGTTGTGTAAC 3'                                                |
| <i>RAC1</i> -P29S <sup>4</sup>       | F: 5'- TCAAGTGTGTGGTGGTGGGAG -3' B:<br>R:5'- TTTGCGGATAGGATAGGGGGCG -3'                                                                              |
| <i>RAC1</i> -F28L <sup>5</sup>       | 5' CAGTTACACAACCAATGCACTTCCTGGAGAATATATCCC 3'<br>5' GGGATATATTCTCCAGGAAGTGCATTGGTTGTGTAAC 3'                                                         |

<sup>1</sup>The F1/B1 primers were used for the TaqMan® assay (Applied Biosystems, Carlsbad, California) and targeted amplification for Sanger sequencing to assess and validate *RAC1*<sup>P29S</sup> mutation. The F2/B2 primers were used to assess the *RAC1*<sup>P29S</sup> mutation in 76 melanoma cell lines in the Oncogenomics Laboratory, Queensland Institute of Medical Research by Sanger sequencing using BigDye Terminator v3.1 chemistry on a 3730xl DNA Analyzer (Applied Biosystems).

<sup>2</sup>These primers were used to PCR amplify and subclone Q220X/R301C mutation region from cDNA. The amplified PCR fragments were cloned into the pCR4-TOPO TA cloning vector (Invitrogen). One Shot TOP10 (Invitrogen) competent E. coli cells were transformed with the TOPO cloning reaction following the

<sup>3</sup>These primers were used for site-directed mutagenesis to generate the P29S mutation in plasmids encoding *RAC1* with the QuikChange kit (Stratagene, La Jolla, CA).

<sup>4</sup>These primers were used to validate the mutations in the vector.

<sup>5</sup>These primers were used for site-directed mutagenesis to generate the F28L mutation in plasmids encoding *RAC1* with the QuikChange kit.
